# Supplementary material for: Chrysosporazines Revisited: Regioisomeric Phenylpropanoid Piperazine P-Glycoprotein Inhibitors from Australian Marine Fish-Derived Fungi
Source: MDPI journal article supplement (doi:10.3390/molecules27103172), 2022-05-16
Supplement: s1 [file s1]

## **Supplementary Material**

### **Chrysosporazines Revisited: Regioisomeric phenylpropanoid piperazine P-glycoprotein inhibitors from Australian marine fish-derived fungi.**

**Amila Agampodi Dewa, Zeinab G. Khalil, Ahmed elbanna and Robert J. Capon\***

Institute for Molecular Bioscience, The University of Queensland, St Lucia, QLD, Australia

**\* Correspondence:** Professor Robert Capon

Tel +61 7 3346 2979. Facsimile +61 7 3346 2090. Email: [r.capon@uq.edu.au](mailto:r.capon@uq.edu.au)

## Table of content

|                                                                                                                  |      |
|------------------------------------------------------------------------------------------------------------------|------|
| Table of content .....                                                                                           | ii   |
| List of figures.....                                                                                             | iv   |
| List of Tables .....                                                                                             | vii  |
| List of Schemes .....                                                                                            | viii |
| 1 Fungal Isolation and phylogenetic tree.....                                                                    | 1    |
| 2 Cultivation of <i>Aspergillus</i> sp. CMB-F661, production and isolation of chrysosporazine T and U (1-2)..... | 3    |
| 3 <i>Aspergillus</i> sp. CMB-F661 media MATRIX study .....                                                       | 4    |
| 4 Analytical scale precursor-directed feeding studies for CMB-F455 .....                                         | 7    |
| 5 Scaled-up cultivation of CMB-F661 with sodium nicotinate.....                                                  | 7    |
| 6 Scaled-up cultivation of CMB-F661 with sodium isonicotinate .....                                              | 8    |
| 7 Identification of natural azachrysosporazine T1 and U1 .....                                                   | 8    |
| 8 Chemical analysis of <i>Spiromastix</i> sp. CMB-F455.....                                                      | 9    |
| 9 MATRIX study for <i>Spiromastix</i> sp. CMB-F455 .....                                                         | 10   |
| 10 Precursor directed biosynthesis for <i>Spiromastix</i> sp. CMB-F455 .....                                     | 12   |
| 11 Chrysosporazine T (1) .....                                                                                   | 13   |
| 12 Chrysosporazine U (2).....                                                                                    | 18   |
| 13 Azachrysosporazine T1 (3).....                                                                                | 19   |
| 14 Azachrysosporazine U1 (4) .....                                                                               | 24   |
| 15 Neochrysosporazine R (5) .....                                                                                | 25   |
| 16 Neochrysosporazine S (6).....                                                                                 | 30   |
| 17 Chrysosporazine D (7).....                                                                                    | 31   |
| 18 Brasiliamide A (8) .....                                                                                      | 32   |
| 19 Acid hydrolysis of chrysosporazine U (2).....                                                                 | 34   |
| 20 Acid hydrolysis of azachrysosporazine U1 (4).....                                                             | 34   |

|    |                                             |    |
|----|---------------------------------------------|----|
| 21 | Acid hydrolysis of neochrysozine S (6)..... | 35 |
| 22 | Antimicrobial Activity.....                 | 36 |
| 23 | Cytotoxicity and P-gp activity.....         | 36 |

## List of figures

|                                                                                                                                                                                                                                                                                                                                                                                                                                             |   |
|---------------------------------------------------------------------------------------------------------------------------------------------------------------------------------------------------------------------------------------------------------------------------------------------------------------------------------------------------------------------------------------------------------------------------------------------|---|
| Figure S1. (a) CMB-F661, (b) CMB-F455 fungal strains cultured in PD agar plate.....                                                                                                                                                                                                                                                                                                                                                         | 1 |
| Figure S2. Phylogenetic tree by PhyML Maximum Likelihood analysis of 18s rRNA sequences showing the relationship of CMB-F214, CMB-F294, CMB-F661 and CMB-F455 among selected other reference strains.....                                                                                                                                                                                                                                   | 1 |
| Figure S3. HPLC-DAD profile at 210 nm of CMB-F661 PDA extract and UV-vis spectra of metabolites.....                                                                                                                                                                                                                                                                                                                                        | 3 |
| Figure S4. CMB-F661 on different culture conditions (MATRIX) (a) liquid shaking; (b) liquid static and (c) solid agar.....                                                                                                                                                                                                                                                                                                                  | 4 |
| Figure S5. UPLC-DAD (210 nm) chromatograms for cultivation of CMB-F661 on different culture conditions (MATRIX) and production of chrysosporazines T–U (1–2) (red peaks), across different media: (A) M1; (B) M2; (C) ISP-2; (D) IMA; (E) CG; (F) TS; (G) YEME; (H) YES; (I) PD; (J) PYG; (K) SD, each media under different conditions: (i) solid agar; (ii) static broth; (iii) shaken broth, (iv) media blank, *internal calibrant. .... | 5 |
| Figure S6: GNPS molecular networking analysis of selected <i>Aspergillus</i> sp. CMB-F661media MATRIX cultivation extracts in solid agar condition; CGA and/or IMA (pink); YEME and/or YES (orange); M1 and/or M2 (green); PDA and/or PYG (purple); and ISP2 and/or SDA (blue). ....                                                                                                                                                        | 6 |
| Figure S7. UPLC-DAD (210 nm) of CMB-F661 cultivated in PDA media in the presence of (a) sodium nicotinate (2mg/mL); (b) sodium isonicotinate (2mg/mL); (c) sodium benzoate (2mg/mL); (d) sodium picolinate (2mg/mL); (e) CMB-F214 control (red peaks represent the predicted new unnatural chrysosporazines, blue peaks represent the chrysosporazine T (1) and U (2))......                                                                | 7 |
| Figure S8: UPLC-QTOF-SIE analysis of an PDA agar culture of CMB-F661 (without sodium nicotinate feeding), (a) CMB-F661 PDA agar culture; (b) SIE at $m/z$ 486; (c) purified azachrysosporazine T1 (3); (d) purified neochrysosporazine R (5); (e) purified chrysosporazine T (1); (f) SIE at $m/z$ 488; (g) purified azachrysosporazine U1 (4); (h) purified neochrysosporazine S (6); (i) purified chrysosporazine U (2) .....             | 8 |
| Figure S9. GNPS molecular networking and HPLC-DAD (210 nm) analysis of a M1 solid phase cultivation of <i>Spiromastix</i> sp. CMB-F455.....                                                                                                                                                                                                                                                                                                 | 9 |



|                                                                                                                                                                                                                                                                                                                                                                                                                                                             |    |
|-------------------------------------------------------------------------------------------------------------------------------------------------------------------------------------------------------------------------------------------------------------------------------------------------------------------------------------------------------------------------------------------------------------------------------------------------------------|----|
| Figure S10. Global natural Product Social (GNPS) molecular networking cluster for chrysosporazines; CMB-F214 pink nodes, CMB-F294 orange nodes, CMB-F661 green nodes, CMB-F455 purple nodes .....                                                                                                                                                                                                                                                           | 10 |
| Figure S11. CMB-F455 on different culture conditions (MATRIX) (a) liquid shaking; (b) liquid static and (c) solid agar.....                                                                                                                                                                                                                                                                                                                                 | 10 |
| Figure S12. UPLC-DAD (210 nm) chromatograms for cultivation of CMB-F455 on different culture conditions (MATRIX) and production of brasiliamide A (8) (red peak), across different media: (A) M1; (B) M2; (C) ISP-2; (D) IMA; (E) CG; (F) TS; (G) YEME; (H) YES; (I) PD; (J) PYG; (K) SD, each media under different conditions: (i) solid agar; (ii) static broth; (iii) shaken broth, (iv) media blank, *internal calibrant .....                         | 11 |
| Figure S13. UPLC-DAD (210 nm) of CMB-F455 cultivated in M1 media in the presence and absence of sodium salts of different acids at 2mg/mL (i) benzoic acid derivatives (a) CMB-F455 control; (b) picolinic acid; (c) isonicotinic acid; (d) nicotinic acid; (e) benzoic acid; (f) M1 media blank; (ii) cinnamic acid derivatives (a) CMB-F455 control; (g) coumaric acid; (h) caffeic acid; (i) cinnamic acid; (f) M1 media blank; *internal calibrant..... | 12 |
| Figure S14. $^1\text{H}$ NMR (600 MHz, $\text{DMSO}-d_6$ ) spectrum for chrysosporazine T (1).....                                                                                                                                                                                                                                                                                                                                                          | 14 |
| Figure S15. Comparison of $^1\text{H}$ NMR (600 MHz, $\text{DMSO}-d_6$ ) spectra of (a) chrysosporazine C (7) and (b) chrysosporazine T (1) .....                                                                                                                                                                                                                                                                                                           | 14 |
| Figure S16. $^{13}\text{C}$ NMR (150 MHz, $\text{DMSO}-d_6$ ) spectrum for chrysosporazine T (1).....                                                                                                                                                                                                                                                                                                                                                       | 15 |
| Figure S17. Expanded HSQC NMR (600 MHz, $\text{DMSO}-d_6$ ) spectrum (part 1) for chrysosporazine T (1), major rotamer (labelled black); minor rotamer (labelled green) .....                                                                                                                                                                                                                                                                               | 15 |
| Figure S18. Expanded HSQC NMR (600 MHz, $\text{DMSO}-d_6$ ) spectrum (part 2) for chrysosporazine T (1), major rotamer (labelled black); minor rotamer (labelled green) .....                                                                                                                                                                                                                                                                               | 16 |
| FigureS19. HMBC NMR (600 MHz, $\text{DMSO}-d_6$ ) spectrum for chrysosporazine T (1) .....                                                                                                                                                                                                                                                                                                                                                                  | 16 |
| Figure S20. COSY NMR (600 MHz, $\text{DMSO}-d_6$ ) spectrum for chrysosporazine T (1) .....                                                                                                                                                                                                                                                                                                                                                                 | 17 |
| Figure S21. ROESY NMR (600 MHz, $\text{DMSO}-d_6$ ) spectrum for chrysosporazine T (1), major rotamer (labelled black); minor rotamer (labelled green) .....                                                                                                                                                                                                                                                                                                | 17 |
| Figure S22. $^1\text{H}$ NMR ( $\text{DMSO}-d_6$ ) spectrum for chrysosporazine U (2) .....                                                                                                                                                                                                                                                                                                                                                                 | 18 |
| Figure S23. $^1\text{H}$ NMR (600 MHz, $\text{DMSO}-d_6$ ) spectrum for a) chrysosporazine T (1), b) chrysosporazine D (7) and chrysosporazine U (2) .....                                                                                                                                                                                                                                                                                                  | 18 |

|                                                                                                                                                                               |    |
|-------------------------------------------------------------------------------------------------------------------------------------------------------------------------------|----|
| Figure S24. $^1\text{H}$ NMR (600 MHz, $\text{DMSO-}d_6$ ) spectrum for azachrysosporazine T1 (3) .....                                                                       | 20 |
| Figure S25. $^{13}\text{C}$ NMR (150 MHz, $\text{DMSO-}d_6$ ) spectrum for azachrysosporazine T1 (3) .....                                                                    | 20 |
| Figure S26. Expanded HSQC NMR (600 MHz, $\text{DMSO-}d_6$ ) spectrum (part 1) for azachrysosporazine T1 (3), major rotamer (labelled black); minor rotamer (labelled green).  | 21 |
| Figure S27. Expanded HSQC NMR (600 MHz, $\text{DMSO-}d_6$ ) spectrum (part 2) for azachrysosporazine T1 (3), major rotamer (labelled black); minor rotamer (labelled green).  | 21 |
| Figure S28. HMBC NMR (600 MHz, $\text{DMSO-}d_6$ ) spectrum for azachrysosporazine T1 (3) ..                                                                                  | 22 |
| Figure S29. COSY NMR (600 MHz, $\text{DMSO-}d_6$ ) spectrum for azachrysosporazine T1 (3) ...                                                                                 | 22 |
| Figure S30. ROESY NMR (600 MHz, $\text{DMSO-}d_6$ ) spectrum for azachrysosporazine T1 (3), major rotamer (labelled black); minor rotamer (labelled green) .....              | 23 |
| Figure S31. $^1\text{H}$ NMR ( $\text{DMSO-}d_6$ ) spectrum for azachrysosporazine U1 (4) .....                                                                               | 24 |
| Figure S32. $^1\text{H}$ NMR (600 MHz, $\text{DMSO-}d_6$ ) spectrum for a) chrysosporazine U (2), b) azachrysosporazine U1 (4) .....                                          | 24 |
| Figure S33. $^1\text{H}$ NMR (600 MHz, $\text{DMSO-}d_6$ ) spectrum for neochrysosporazine R (5) .....                                                                        | 26 |
| Figure S34. $^{13}\text{C}$ NMR (150 MHz, $\text{DMSO-}d_6$ ) spectrum for neochrysosporazine R (5) .....                                                                     | 26 |
| Figure S35. Expanded HSQC NMR (600 MHz, $\text{DMSO-}d_6$ ) spectrum (part 1) for neochrysosporazine R (5), major rotamer (labelled black); minor rotamer (labelled green) .. | 27 |
| Figure S36. Expanded HSQC NMR (600 MHz, $\text{DMSO-}d_6$ ) spectrum (part 2) for neochrysosporazine R (5), major rotamer (labelled black); minor rotamer (labelled green) .. | 27 |
| Figure S37. HMBC NMR (600 MHz, $\text{DMSO-}d_6$ ) spectrum for neochrysosporazine R (5) ...                                                                                  | 28 |
| Figure S38. COSY NMR (600 MHz, $\text{DMSO-}d_6$ ) spectrum for neochrysosporazine R (5) ....                                                                                 | 28 |
| Figure S39. ROESY NMR (600 MHz, $\text{DMSO-}d_6$ ) spectrum for neochrysosporazine R (5), major rotamer (labelled black); minor rotamer (labelled green) .....               | 29 |
| Figure S40. $^1\text{H}$ NMR ( $\text{DMSO-}d_6$ ) spectrum for neochrysosporazine S (6) .....                                                                                | 30 |
| Figure S41. $^1\text{H}$ NMR (600 MHz, $\text{DMSO-}d_6$ ) spectrum for a) chrysosporazine U (2), b) neochrysosporazine S (6) .....                                           | 30 |
| Figure S42. $^1\text{H}$ NMR (600 MHz, $\text{DMSO-}d_6$ ) spectrum for (a) known chrysosporazine D (7), (b) CMB-F455 isolated (7) .....                                      | 31 |

|                                                                                                                                                                                                                                                                                                                                                                                                                                                                                                                                                                            |    |
|----------------------------------------------------------------------------------------------------------------------------------------------------------------------------------------------------------------------------------------------------------------------------------------------------------------------------------------------------------------------------------------------------------------------------------------------------------------------------------------------------------------------------------------------------------------------------|----|
| Figure S43. <sup>1</sup> H NMR (CDCl <sub>3</sub> ) spectrum for brasiliamide A (8) .....                                                                                                                                                                                                                                                                                                                                                                                                                                                                                  | 33 |
| Figure S44. <sup>13</sup> C NMR (CDCl <sub>3</sub> ) spectrum for brasiliamide A (8) .....                                                                                                                                                                                                                                                                                                                                                                                                                                                                                 | 33 |
| Figure S45. UPLC-DAD (210 nm) of acid hydrolysis of chrysosporazine U (2). (a) purified 2; acid hydrolysis of 2 at (b) 12 hr, (c) 24 hr and (d) 36 hr; (e) purified 10 .....                                                                                                                                                                                                                                                                                                                                                                                               | 34 |
| Figure S46. UPLC-DAD (210 nm) of acid hydrolysis of azachrysosporazine U1 (4). (a) purified 4; acid hydrolysis of 4 at (b) 12 hr, (c) 24 hr and (d) 36 hr; (e) purified 10 .....                                                                                                                                                                                                                                                                                                                                                                                           | 34 |
| Figure S47. UPLC-DAD (210 nm) of acid hydrolysis of neochrysosporazine S (6). (a) purified 6; acid hydrolysis of 6 at (b) 12 hr, (c) 24 hr and (d) purified 10 .....                                                                                                                                                                                                                                                                                                                                                                                                       | 35 |
| Figure S48: Comparison of UPLC-DAD retention times for 12hr hydrolysis products of (a) chrysosporazine U (2); (b) chrysosporazine D (7); (c) azachrysosporazine U1 (4); (d) azachrysosporazine D1 (12); (e) neochrysosporazine S (6); (f) neochrysosporazine J (14) ...                                                                                                                                                                                                                                                                                                    | 35 |
| Figure S49. Growth inhibitory activity of chrysosporazines 1–9 .....                                                                                                                                                                                                                                                                                                                                                                                                                                                                                                       | 36 |
| Figure S50. (A) cytotoxicity of chrysosporazines (1–14), doxorubicin and verapamil against SW620. (B) effect of chrysosporazines or verapamil (2.5 μM) on the sensitivity of P-gp overexpressing SW620 Ad300 cancer cells to doxorubicin. 48 h MTT cytotoxicity assay was performed with a series of concentrations of doxorubicin (30 – 0.01 μM) on P-gp overexpressing SW620 Ad300 in the presence and absence of verapamil (2.5 μM) or 2.5 μM chrysosporazines (1–4). Data points are the means of ± SEM of duplicate determination from two independent cultures. .... | 36 |

## List of Tables

|                                                                                                                          |    |
|--------------------------------------------------------------------------------------------------------------------------|----|
| Table S1. Compositions of solid and liquid-based media used in MATRIX study .....                                        | 4  |
| Table S2. Compounds corresponds to the cluster nodes in GNPS molecular networking for CMB-F455 .....                     | 10 |
| Table S3. 1D and 2D NMR (600 MHz, DMSO- <i>d</i> <sub>6</sub> ) data for chrysosporazine T (1) (major rotamer) .....     | 13 |
| Table S4. 1D and 2D NMR (600 MHz, DMSO- <i>d</i> <sub>6</sub> ) data for azachrysosporazine T1 (3) (major rotamer) ..... | 19 |

|                                                                                                                                                                      |    |
|----------------------------------------------------------------------------------------------------------------------------------------------------------------------|----|
| Table S5. 1D and 2D NMR (600 MHz, DMSO- <i>d</i> <sub>6</sub> ) data for neochrysosporazine R (5) (major rotamer) .....                                              | 25 |
| Table S6. 1D and 2D NMR (600 MHz, CDCl <sub>3</sub> ) data for brasiliamide A (8) .....                                                                              | 32 |
| Table S7. Effect of chrysosporazines (1–14) on inhibition of P-gp mediated resistance to doxorubicin in SW620 Ad300 and cytotoxicity against susceptible SW620 ..... | 37 |

## List of Schemes

|                                                                                                                                                                                                                                             |   |
|---------------------------------------------------------------------------------------------------------------------------------------------------------------------------------------------------------------------------------------------|---|
| Scheme S1. Isolation scheme of chrysosporazine T and U (1–2): a) trituration of crude extract with <i>n</i> -hexane (-1) and DCM (-2); b) preparative HPLC fractionation for 400 mg; c) semi-preparative HPLC purification .....            | 3 |
| Scheme S2: Isolation scheme of azachrysosporazine T1 and U1(3–4): a) trituration of crude extract with <i>n</i> -hexane (-1) and DCM (-2); b) preparative HPLC fractionation for 380 mg; c) semi-preparative HPLC purification .....        | 7 |
| Scheme S3: Isolation scheme of neochrysosporazine R–S (5–6): a) trituration of crude extract with <i>n</i> -hexane (-1) and DCM (-2); b) preparative HPLC fractionation for 500 mg; c) semi-preparative HPLC purification .....             | 8 |
| Scheme S4. Isolation scheme of chrysosporazine D (7) and brasiliamide A (8): a) trituration of crude extract with <i>n</i> -hexane (-1) and MeOH (-2); b) preparative HPLC fractionation for 280 mg; c) semi-preparative purification ..... | 9 |

# 1 Fungal Isolation and phylogenetic tree

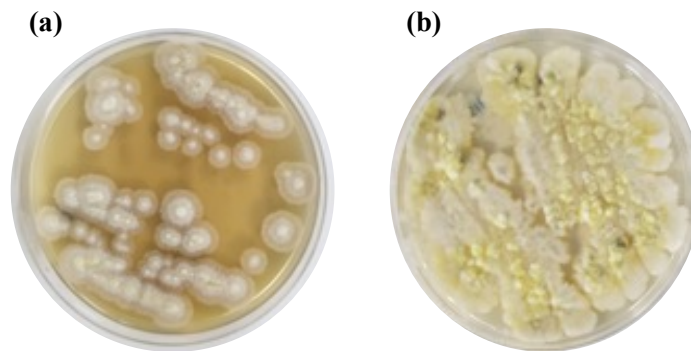

**Figure S1.** (a) CMB-F661, (b) CMB-F455 fungal strains cultured in PD agar plate

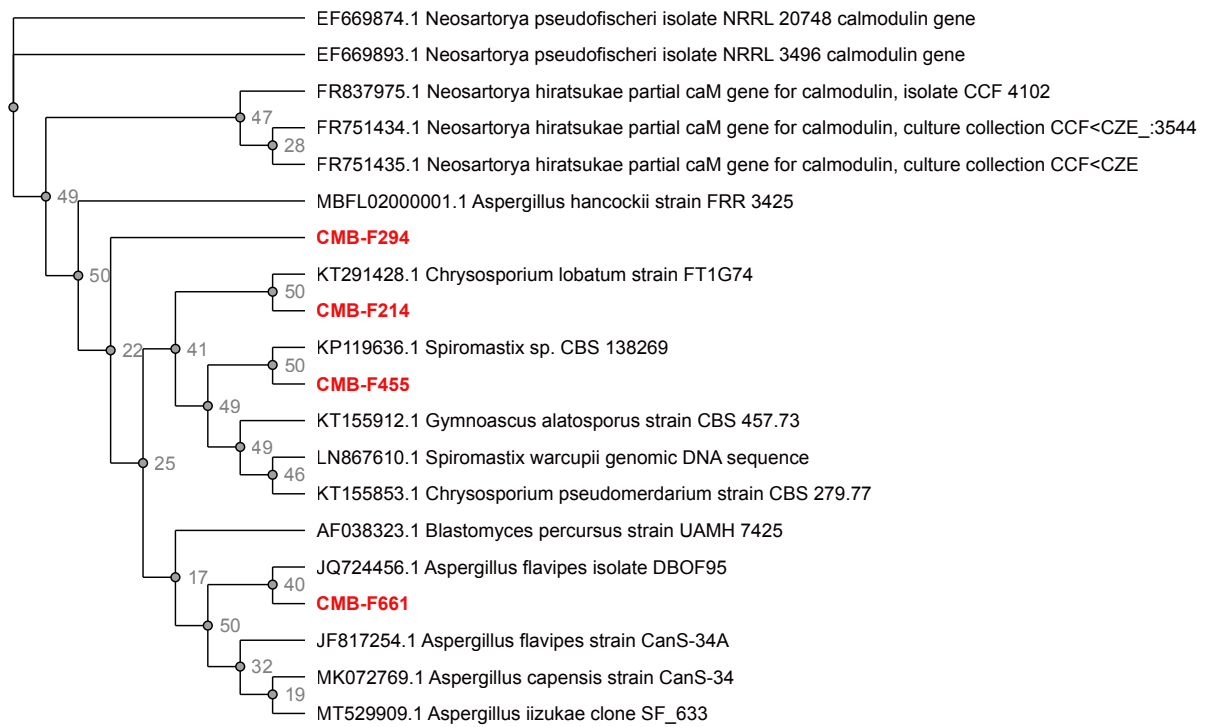

**Figure S2.** Phylogenetic tree by PhyML Maximum Likelihood analysis of 18s rRNA sequences showing the relationship of CMB-F214, CMB-F294, CMB-F661 and CMB-F455 among selected other reference strains

### **ITS gene sequence for CMB-F661**

GGGTCTCGTGGCCCAACCTCCCACCCGTGACTACTGTACCACTGTTGCTTCGGCG  
GGCCCGCCAGCGTCCGCTGGCCGCCGGGGGGCTTCTGCCCCCGGGCCCGTGCCC  
GCCGGAGACCCCAACACGAACACTGTTTCTGAAAGCCTGTATGAATCCGATTCTT  
TGTAATCAGTTAAAACTTTCAACAATGGATCTCTTGGTTCCGGCATCGATGAAGA  
ACGCAGCGAAATGCGATAACTAATGTGAATTGCAGAATTCAGTGAATCATCGAG  
TCTTTGAACGCACATTGCGCCCCCTGGTATTCCGGGGGGCATGCCTGTCCGAGCG  
TCATTACTGCCCTCAAGCCCGGCTTGTATTGGGTCCTCGTCCCCCTCCCCGGGGG  
ACGGGCCCCGAAAGGCAGCGGCGGCACCGCGTCCGGTCCTCGAGCGTATGGGGCT  
TTGTACACCGCTCTGTAGGCCCGGCCGGCGCCAGCCACGCAACACCTTTTTTTTT  
CAGGTTGACCTCGGATCAGGTAGGGATAACCGCTGAACTTAAGCATATCAATAA  
GGCGGAGGAA

### **ITS gene sequence of CMB-F455**

GCGCGGTCGCCGGCGGCTCCCTCTCCGGGGGGTTCGTTTCGGCGCCGCGTCCGGC  
CCAACCGTGTCTATCTGTACCTGTTGCTTCGGCGGGCCTGCGGGCCTCGCTCGCT  
GCCGGGGGGCCCCCTGGGGCTCCGGGCTCGTGCCCGCCGGAGACACCTGGAAC  
CTGTCGAAGTTGGCGGTCTGAGTAACTTGATAATCATCAAACTTTCAACAACG  
GATCTCTTGGTTCCGGCATCGATGAAGAACGCAGCGAAATGCGATAAGTAATGT  
GAATTGCAGAATTCCGTGAATCATCGAATCTTTGAACGCACATTGCGCCCCCTGG  
TATTCCGGGGGGCATGCCTGTCCGAGCGTCATTGCAACCCCTTCAAGCCCGGCTT  
GTGTGTTGGGCGTCGTCCCCGCTGGACGCGCCCGAAAGGCAGTGGCGGCTCCGT  
GTCCGGTGCCCGAGCGTATGGGCTTTATCACCCGCTCCAGAGGCCCGGCCGGCGC  
TGGCCCCGCGAGCCTTGACTGAACTCCAGTTAAGGTCTCAACTAAACTTTTCGT  
GGTTGACCTCGGATCAGGTAGGGATAACCGCTGAACTTAAGCATATCAATAA

## 2 Cultivation of *Aspergillus* sp. CMB-F661, production and isolation of chrysosporazine T and U (1-2)

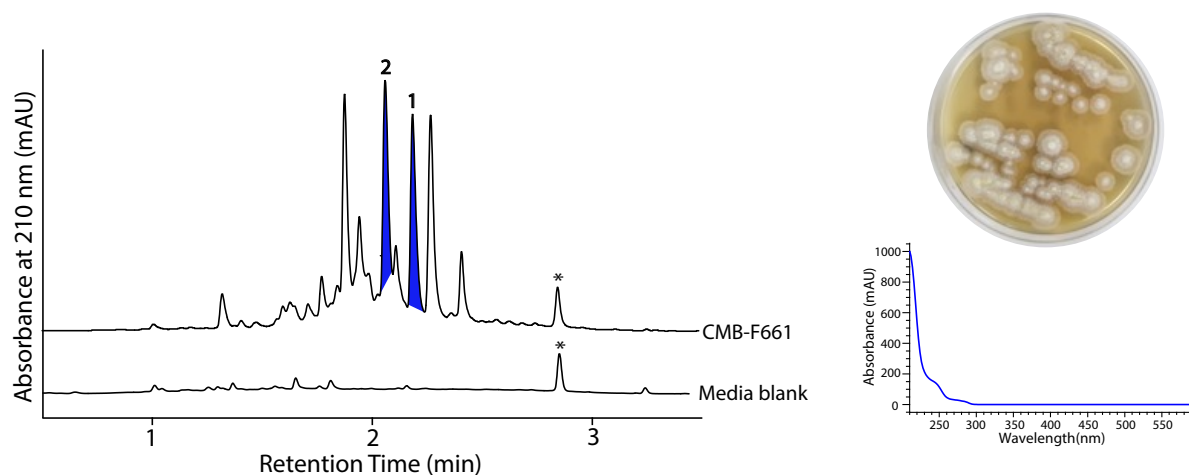

**Figure S3.** HPLC-DAD profile at 210 nm of CMB-F661 PDA extract and UV-vis spectra of metabolites

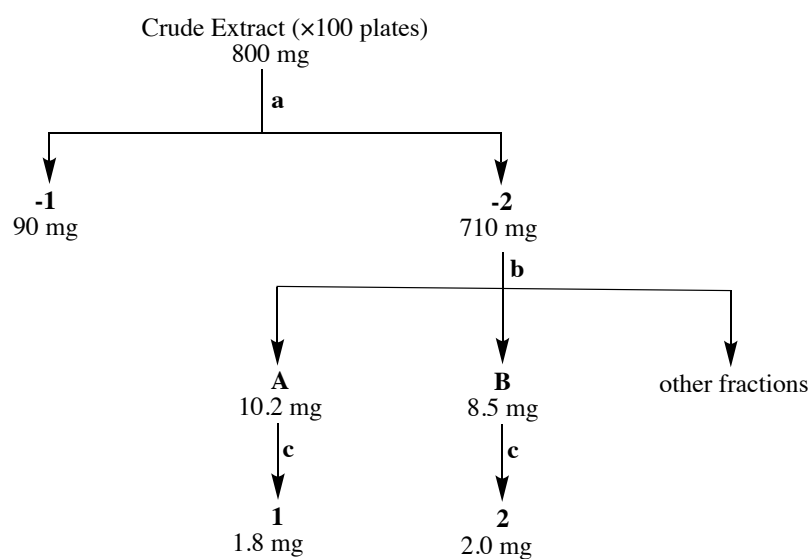

**Scheme S1.** Isolation scheme of chrysosporazine T and U (1-2): a) trituration of crude extract with *n*-hexane (-1) and DCM (-2); b) preparative HPLC fractionation for 400 mg; c) semi-preparative HPLC purification

### 3 *Aspergillus* sp. CMB-F661 media MATRIX study

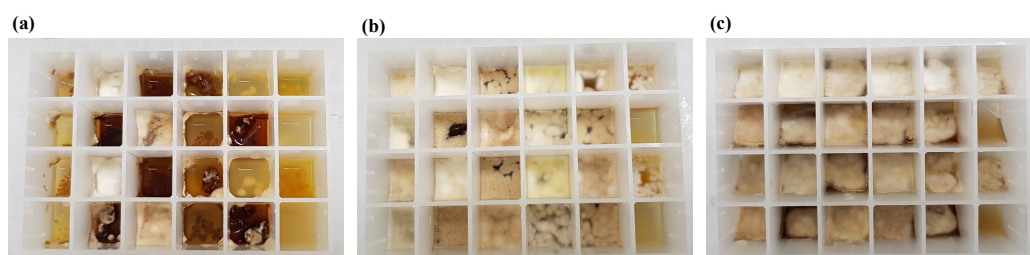

**Figure S4.** CMB-F661 on different culture conditions (MATRIX) (a) liquid shaking; (b) liquid static and (c) solid agar

**Table S1.** Compositions of solid and liquid-based media used in MATRIX study

| Media | Composition (per Litre)                                                                                                                                                                                                                                                                                                                                                                                                                                                                                                                                                                                                                                                                |
|-------|----------------------------------------------------------------------------------------------------------------------------------------------------------------------------------------------------------------------------------------------------------------------------------------------------------------------------------------------------------------------------------------------------------------------------------------------------------------------------------------------------------------------------------------------------------------------------------------------------------------------------------------------------------------------------------------|
| M1    | Peptone (2.0 g), Yeast extract (4.0 g), Starch (10.0 g)                                                                                                                                                                                                                                                                                                                                                                                                                                                                                                                                                                                                                                |
| M2    | Mannitol (40.0 g), Maltose (40.0 g), Yeast extract (10.0 g), K <sub>2</sub> HPO <sub>4</sub> (2.0 g), MgSO <sub>4</sub> . 7H <sub>2</sub> O (0.5 g), FeSO <sub>4</sub> .7H <sub>2</sub> O (0.01 g)                                                                                                                                                                                                                                                                                                                                                                                                                                                                                     |
| ISP-2 | Yeast extract (4.0 g), Malt extract (10.0 g), Glucose (4.0 g)                                                                                                                                                                                                                                                                                                                                                                                                                                                                                                                                                                                                                          |
| IMA   | Yeast extract (4 g), Malt extract (10 g), Glucose (4 g), Mannitol (40 g)                                                                                                                                                                                                                                                                                                                                                                                                                                                                                                                                                                                                               |
| CGA   | Glycerol (30 g), Casein peptone (Amyl) (2 g), K <sub>2</sub> HPO <sub>4</sub> (1 g), K <sub>2</sub> HPO <sub>4</sub> (1 g), NaCl (1 g), MgSO <sub>4</sub> .7H <sub>2</sub> O (0.5 g), Trace element solution (5 mL)*<br>*Trace element solution, CaCl <sub>2</sub> .2H <sub>2</sub> O (3 g), FeC <sub>6</sub> O <sub>7</sub> H <sub>5</sub> (1 g), MnSO <sub>4</sub> (0.2 g), ZnCl <sub>2</sub> (0.1 g), CuSO <sub>4</sub> .5H <sub>2</sub> O (0.025 g), Na <sub>2</sub> B <sub>4</sub> O <sub>7</sub> .10H <sub>2</sub> O (0.02 g), CoCl <sub>2</sub> (0.004 g), Na <sub>2</sub> MoO <sub>4</sub> .2H <sub>2</sub> O (0.01 g), Distilled H <sub>2</sub> O (1000 mL), Filter sterilize |
| YEME  | Yeast extract (3 g), Peptone (5 g), Malt extract (3 g), Glucose (10 g), Sucrose (170 g)                                                                                                                                                                                                                                                                                                                                                                                                                                                                                                                                                                                                |
| YES   | Sucrose (150 g), Yeast extract (20 g), MgSO <sub>4</sub> .7H <sub>2</sub> O (0.5 g), ZnSO <sub>4</sub> .7H <sub>2</sub> O (0.01 g), CuSO <sub>4</sub> .5H <sub>2</sub> O (0.005 g)                                                                                                                                                                                                                                                                                                                                                                                                                                                                                                     |
| PDA   | Potato extract (4.0 g), Dextrose (20.0 g)                                                                                                                                                                                                                                                                                                                                                                                                                                                                                                                                                                                                                                              |
| TSA   | Pancreatic digest of casein (15.0 g), Peptic digest of soybean (5.0 g), NaCl (5.0 g)                                                                                                                                                                                                                                                                                                                                                                                                                                                                                                                                                                                                   |
| SDA   | Peptic digest of animal tissue (5.0 g), Pancreatic digest of casein (5.0 g), Dextrose (40.0 g)                                                                                                                                                                                                                                                                                                                                                                                                                                                                                                                                                                                         |
| PYG   | Peptone (10 g), Yeast Extract (5 g) Dextrose (20 g)                                                                                                                                                                                                                                                                                                                                                                                                                                                                                                                                                                                                                                    |
| ISP-4 | Soluble starch (10.0 g), CaCO <sub>3</sub> (2.0 g), (NH <sub>4</sub> ) <sub>2</sub> SO <sub>4</sub> (2.0 g), K <sub>2</sub> HPO <sub>4</sub> (1.0 g), MgSO <sub>4</sub> .7H <sub>2</sub> O (1.0 g), NaCl (1.0 g), FeSO <sub>4</sub> .7H <sub>2</sub> O (1 mg), MnCl <sub>2</sub> .7H <sub>2</sub> O (1.0 mg), ZnSO <sub>4</sub> .7H <sub>2</sub> O (1.0 mg)                                                                                                                                                                                                                                                                                                                            |

For solid agar 18 g/L of agar was added in each case



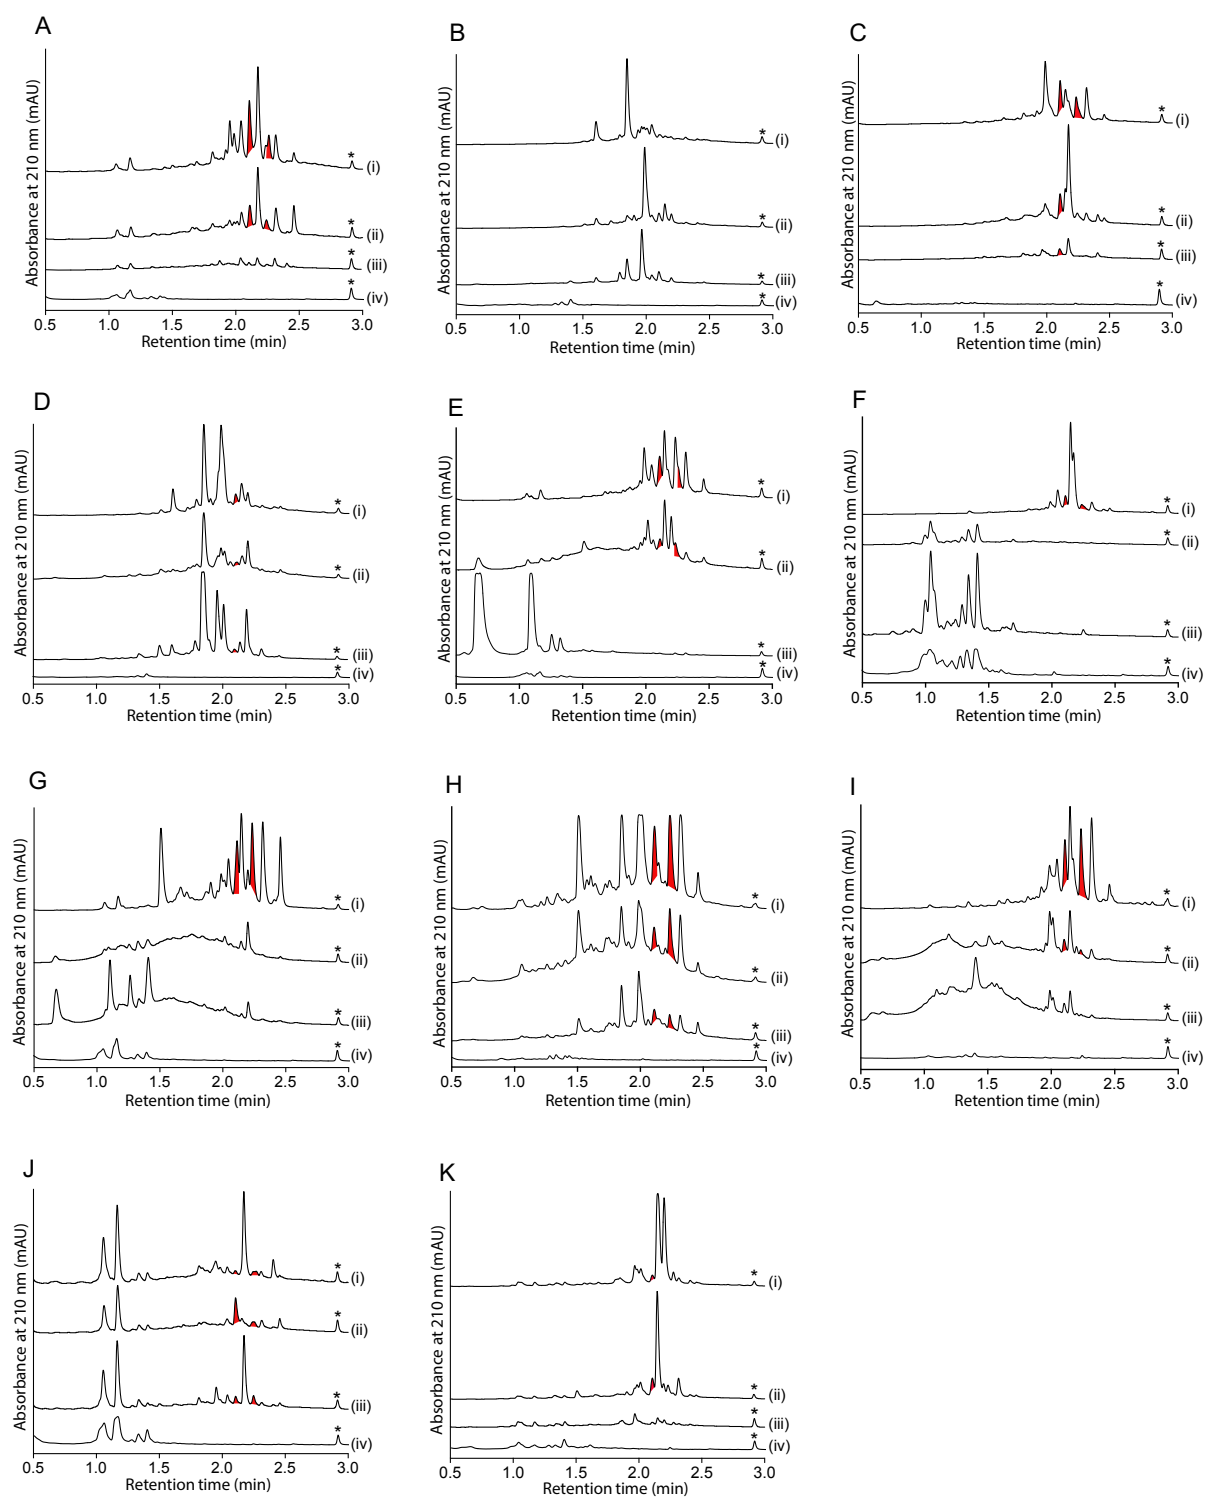

**Figure S5.** UPLC-DAD (210 nm) chromatograms for cultivation of CMB-F661 on different culture conditions (MATRIX) and production of chrysosporazines T–U (1–2) (red peaks), across different media: (A) M1; (B) M2; (C) ISP-2; (D) IMA; (E) CG; (F) TS; (G) YEME; (H) YES; (I) PD; (J) PYG; (K) SD, each media under different conditions: (i) solid agar; (ii) static broth; (iii) shaken broth, (iv) media blank, \*internal calibrant.

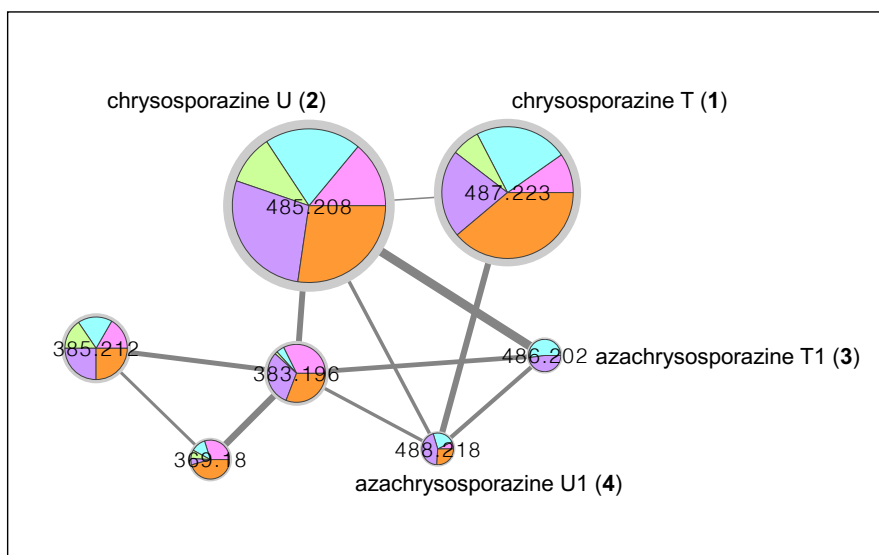

**Figure S6:** GNPS molecular networking analysis of selected *Aspergillus* sp. CMB-F661 media MATRIX cultivation extracts in solid agar condition; CGA and/or IMA (pink); YEME and/or YES (orange); M1 and/or M2 (green); PDA and/or PYG (purple); and ISP2 and/or SDA (blue).

#### 4 Analytical scale precursor-directed feeding studies for CMB-F455

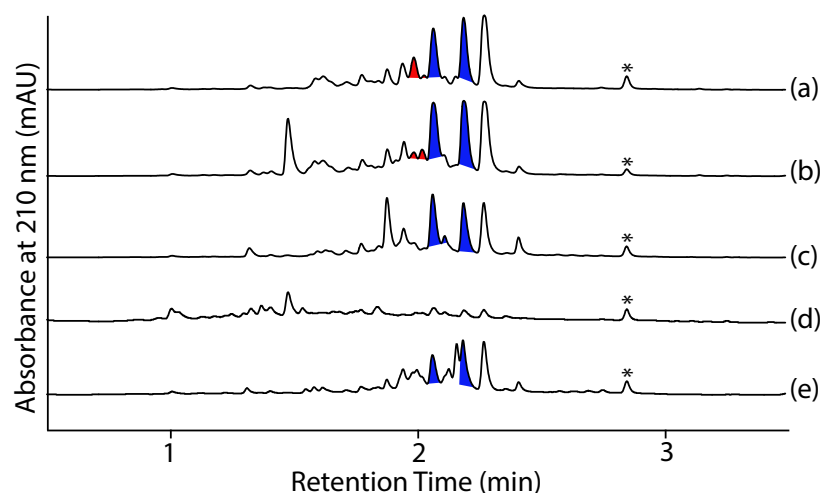

**Figure S7.** UPLC-DAD (210 nm) of CMB-F661 cultivated in PDA media in the presence of (a) sodium nicotinate (2mg/mL); (b) sodium isonicotinate (2mg/mL); (c) sodium benzoate (2mg/mL); (d) sodium picolinate (2mg/mL); (e) CMB-F214 control (red peaks represent the predicted new unnatural chrysosporazines, blue peaks represent the chrysosporazine T (1) and U (2))

#### 5 Scaled-up cultivation of CMB-F661 with sodium nicotinate

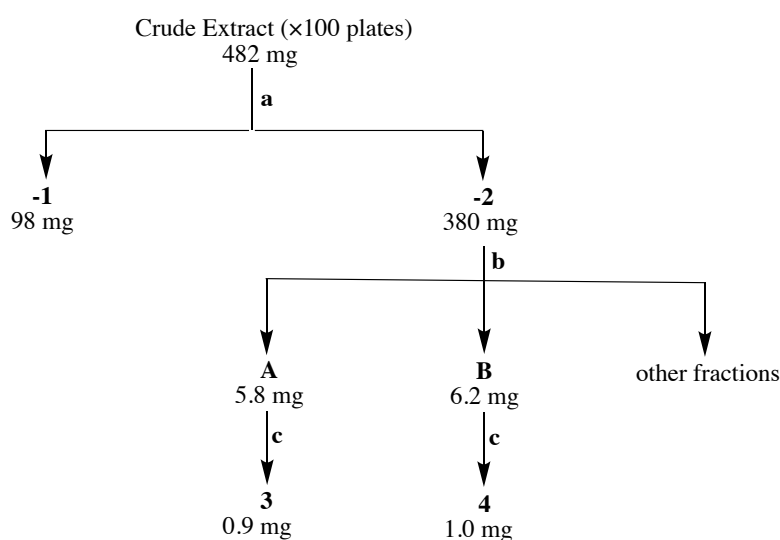

**Scheme S2:** Isolation scheme of azachrysosporazine T1 and U1(3–4): a) trituration of crude extract with *n*-hexane (-1) and DCM (-2); b) preparative HPLC fractionation for 380 mg; c) semi-preparative HPLC purification

## 6 Scaled-up cultivation of CMB-F661 with sodium isonicotinate

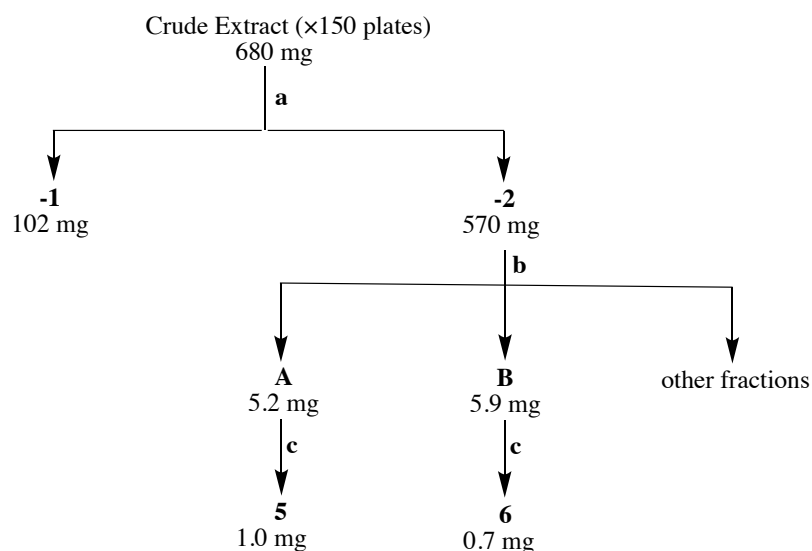

**Scheme S3:** Isolation scheme of neochrysosporazine R-S (5-6): a) trituration of crude extract with *n*-hexane (-1) and DCM (-2); b) preparative HPLC fractionation for 500 mg; c) semi-preparative HPLC purification

## 7 Identification of natural azachrysosporazine T1 and U1

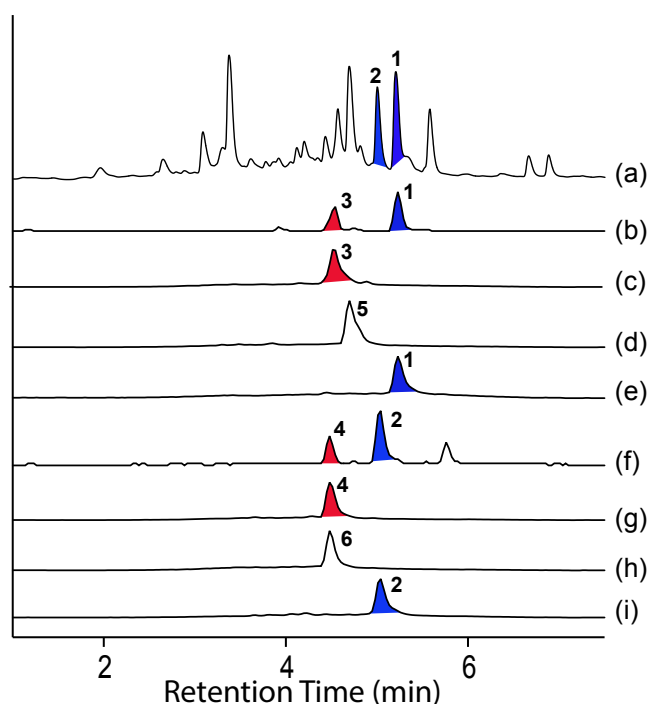

**Figure S8:** UPLC-QTOF-SIE analysis of an PDA agar culture of CMB-F661 (without sodium nicotinate feeding), (a) CMB-F661 PDA agar culture; (b) SIE at  $m/z$  486; (c) purified azachrysosporazine T1 (3); (d) purified neochrysosporazine R (5); (e) purified chrysosporazine T (1); (f) SIE at  $m/z$  488; (g) purified azachrysosporazine U1 (4); (h) purified neochrysosporazine S (6); (i) purified chrysosporazine U (2)

## 8 Chemical analysis of *Spiromastix* sp. CMB-F455

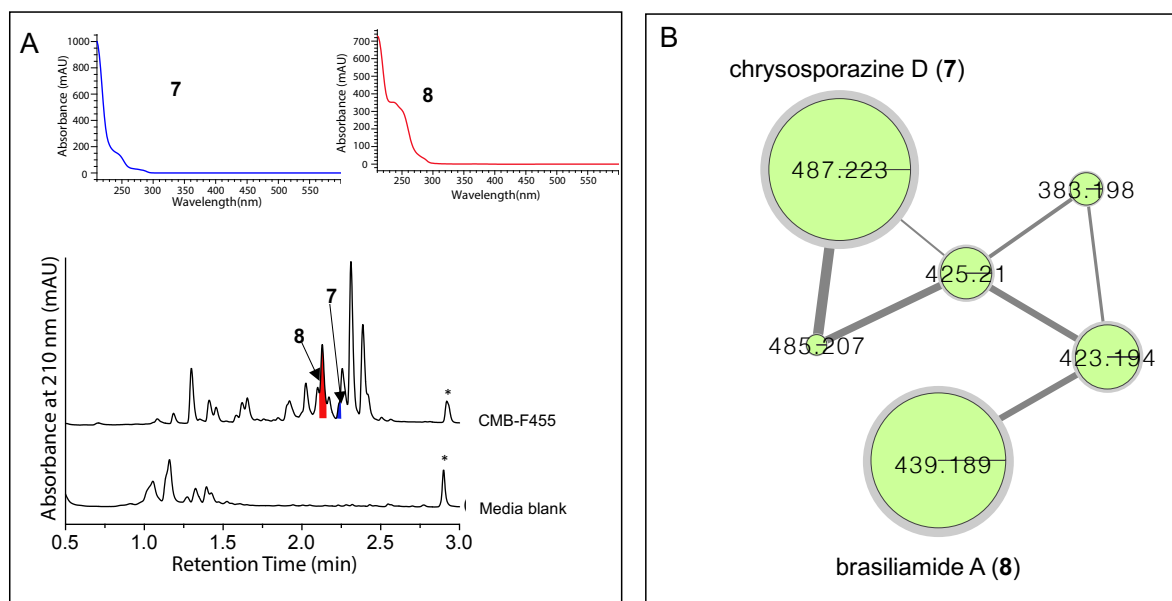

**Figure S9.** GNPS molecular networking and HPLC-DAD (210 nm) analysis of a M1 solid phase cultivation of *Spiromastix* sp. CMB-F455

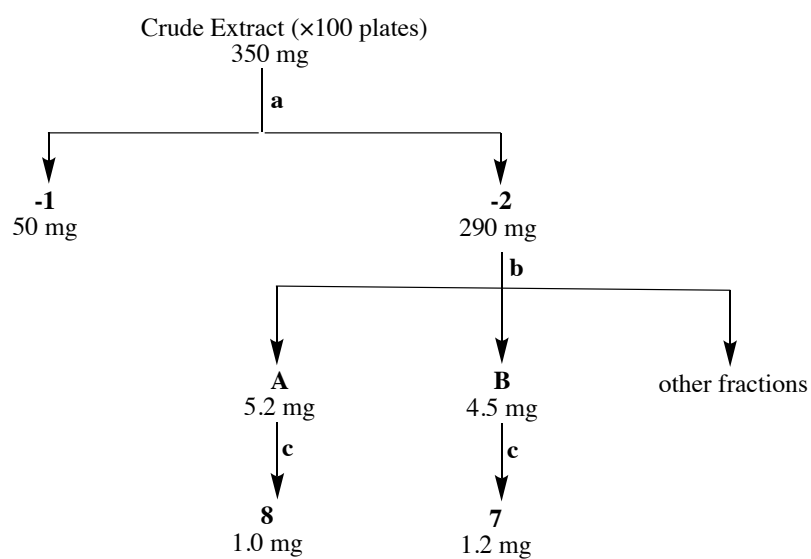

## 9 MATRIX study for *Spiromastix* sp. CMB-F455

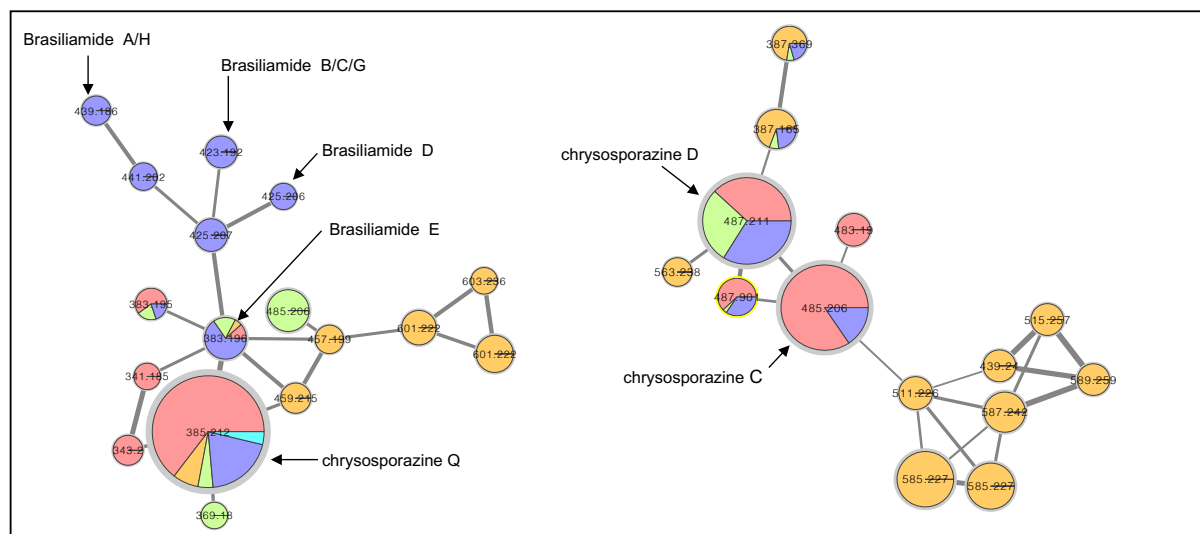

**Figure S10.** Global natural Product Social (GNPS) molecular networking cluster for chrysosporazines; CMB-F214 pink nodes, CMB-F294 orange nodes, CMB-F661 green nodes, CMB-F455 purple nodes

**Table S2.** Compounds corresponds to the cluster nodes in GNPS molecular networking for CMB-F455

| HRESI $m/z$ (M+H) <sup>+</sup> | Suggested formulae                                            | DBE | $\Delta mDa$ | Possible fungal hits                           |
|--------------------------------|---------------------------------------------------------------|-----|--------------|------------------------------------------------|
| 439.1815                       | C <sub>24</sub> H <sub>26</sub> N <sub>2</sub> O <sub>6</sub> | 13  | +2.31        | brasiliamide A, brasiliamide H                 |
| 423.1894                       | C <sub>24</sub> H <sub>26</sub> N <sub>2</sub> O <sub>5</sub> | 13  | +3.34        | brasiliamide B, brasiliamide C, brasiliamide G |
| 425.1998                       | C <sub>24</sub> H <sub>28</sub> N <sub>2</sub> O <sub>5</sub> | 12  | -2.15        | brasiliamide D                                 |
| 383.1998                       | C <sub>22</sub> H <sub>26</sub> N <sub>2</sub> O <sub>4</sub> | 11  | +2.01        | brasiliamide E                                 |
| 485.2011                       | C <sub>29</sub> H <sub>28</sub> N <sub>2</sub> O <sub>5</sub> | 17  | +3.12        | chrysosporazine C                              |
| 487.2099                       | C <sub>29</sub> H <sub>30</sub> N <sub>2</sub> O <sub>5</sub> | 16  | +2.22        | chrysosporazine D                              |
| 385.2099                       | C <sub>22</sub> H <sub>28</sub> N <sub>2</sub> O <sub>4</sub> | 10  | +3.41        | chrysosporazine Q                              |

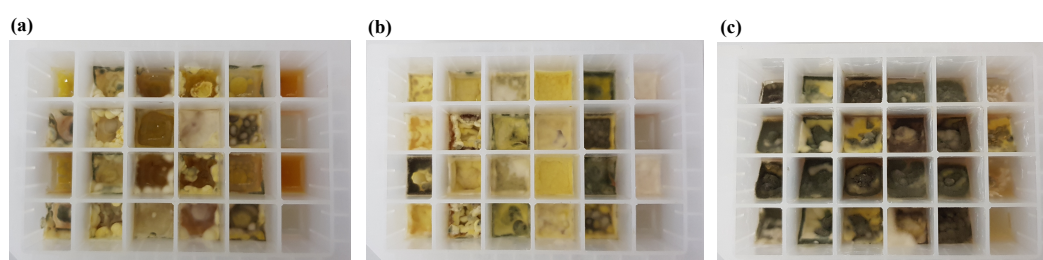

**Figure S11.** CMB-F455 on different culture conditions (MATRIX) (a) liquid shaking; (b) liquid static and (c) solid agar

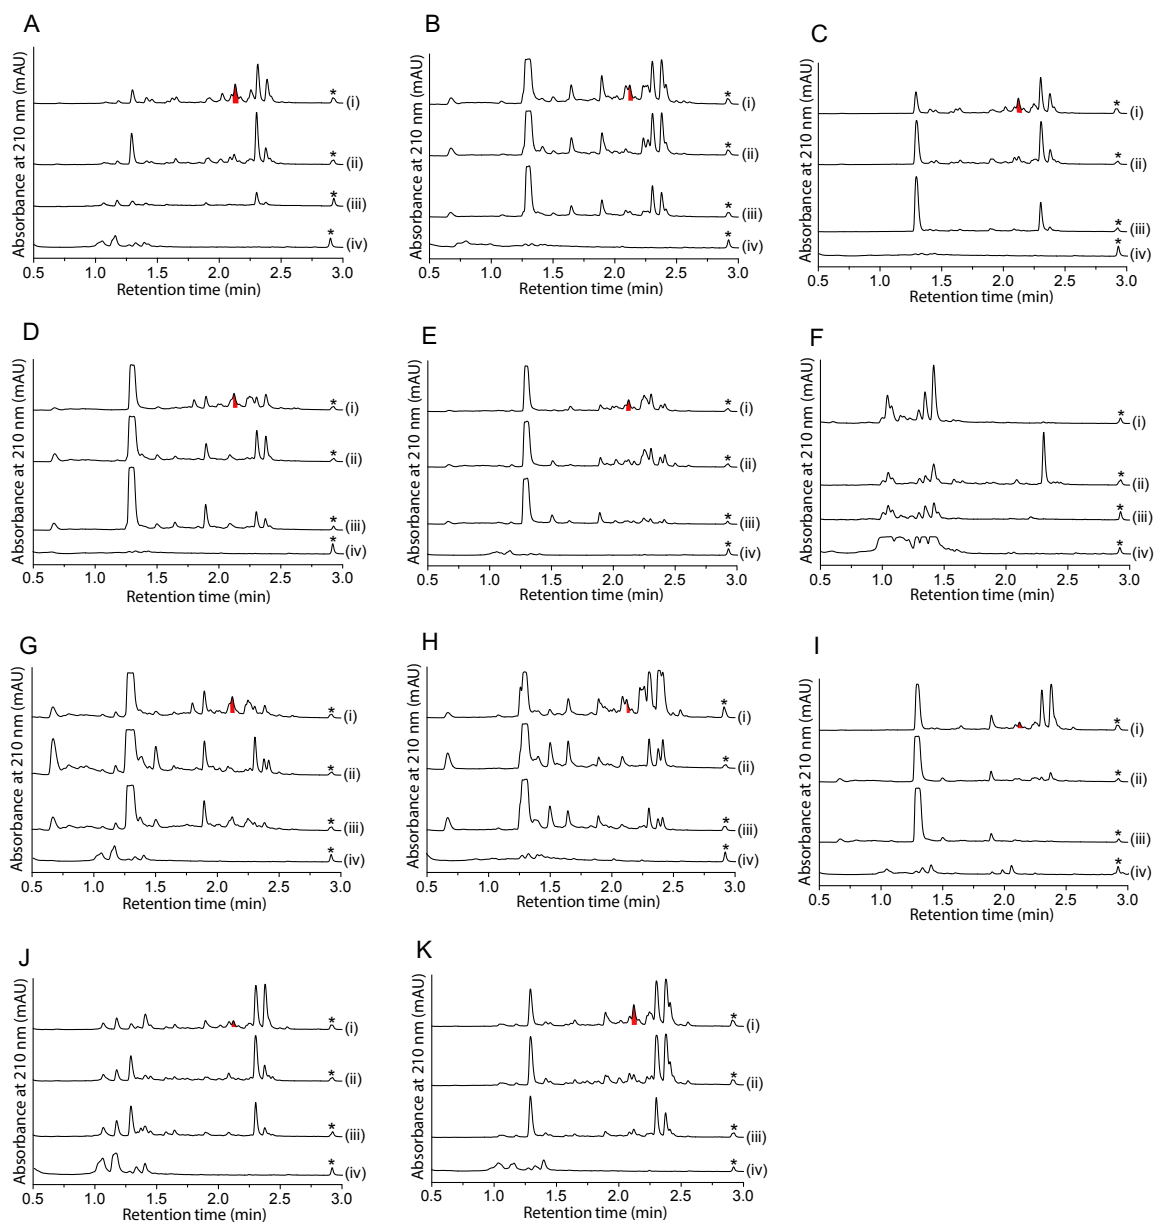

**Figure S12.** UPLC-DAD (210 nm) chromatograms for cultivation of CMB-F455 on different culture conditions (MATRIX) and production of brasiliamide A (**8**) (red peak), across different media: (A) M1; (B) M2; (C) ISP-2; (D) IMA; (E) CG; (F) TS; (G) YEME; (H) YES; (I) PD; (J) PYG; (K) SD, each media under different conditions: (i) solid agar; (ii) static broth; (iii) shaken broth, (iv) media blank, \*internal calibrant

## 10 Precursor directed biosynthesis for *Spiromastix* sp. CMB-F455

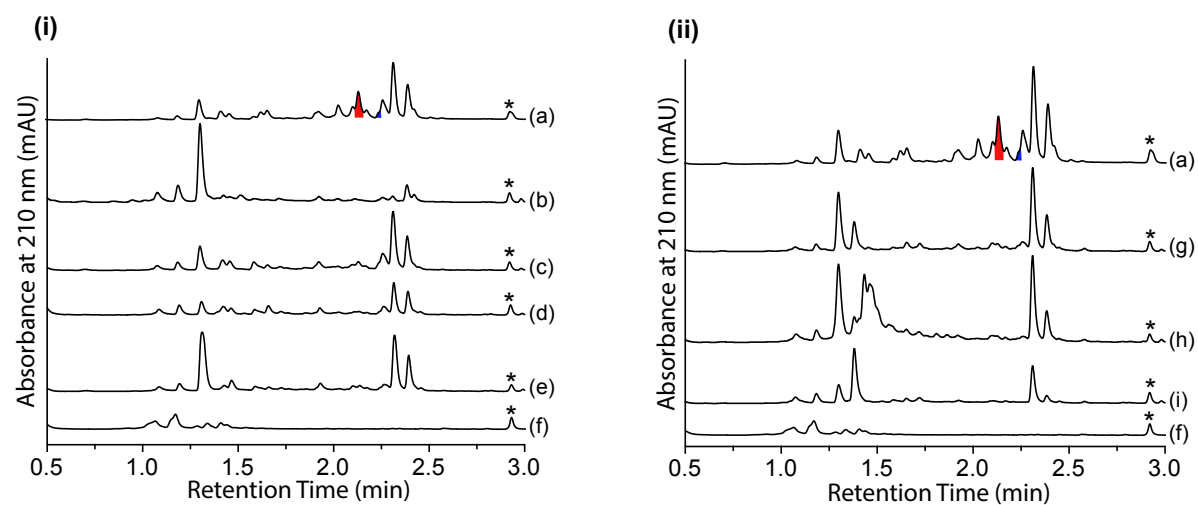

**Figure S13.** UPLC-DAD (210 nm) of CMB-F455 cultivated in M1 media in the presence and absence of sodium salts of different acids at 2mg/mL **(i)** benzoic acid derivatives (a) CMB-F455 control; (b) picolinic acid; (c) isonicotinic acid; (d) nicotinic acid; (e) benzoic acid; (f) M1 media blank; **(ii)** cinnamic acid derivatives (a) CMB-F455 control; (g) coumaric acid; (h) caffeic acid; (i) cinnamic acid; (f) M1 media blank; \*internal calibrant



## 11 Chrysosporazine T (1)

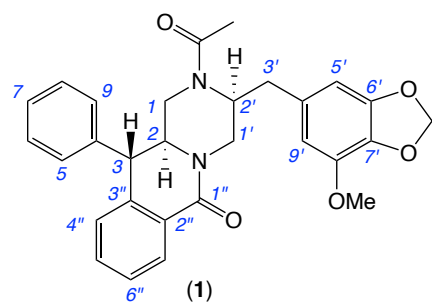

**Table S3.** 1D and 2D NMR (600 MHz, DMSO-*d*<sub>6</sub>) data for chrysosporazine T (1) (major rotamer)

| Position             | $\delta_{\text{H}}$ , multi ( <i>J</i> in Hz)                    | $\delta_{\text{C}}$ | COSY               | $^1\text{H}$ - $^{13}\text{C}$ HMBC      | ROSEY                                                    |
|----------------------|------------------------------------------------------------------|---------------------|--------------------|------------------------------------------|----------------------------------------------------------|
| 1                    | <i>a.</i> 4.14, dd (13.8, 3.9)<br><i>b.</i> 2.94, m              | 40.1                | 1b, 2<br>1a, 2     | 2', 2, 1-NCO<br>2', 2, 3, 1-NCO          | 1b, 2<br>1a, 2, 3                                        |
| 2                    | 3.84, ddd (10.6, 10.6, 3.9)                                      | 57.8                | 1a, 1b, 3          | 1, 3, 4, 3"                              | 1a, 1'b, 5/9                                             |
| 3                    | 4.47, d (10.6)                                                   | 46.3                | 2                  | 1, 2, 4, 5/9, 2'', 3'', 4''              | 1b, 5/9, 4''                                             |
| 4                    | -                                                                | 140.4 <sup>A</sup>  | -                  | -                                        | -                                                        |
| 5/9                  | 7.35, m                                                          | 129.3               | 6/8                | 3, 7, 5/9                                | 2, 3                                                     |
| 6/8                  | 7.44, m                                                          | 129.1               | 5/9                | 4, 6/8                                   | -                                                        |
| 7                    | 7.37, m                                                          | 127.6               | 6/8                | 5/9                                      | -                                                        |
| 1'                   | <i>a.</i> 4.57, dd (13.3, 1.2)<br><i>b.</i> 2.95, m              | 44.6                | 1'b, 2'<br>1'a, 2' | 2, 1'', 2', 3'<br>3'                     | 1'b, 2', 3'b<br>1'a, 2', 2                               |
| 2'                   | 4.21, m                                                          | 54.6                | 1'b, 3'ab          | 1, 3', 1-NCO                             | 1'a, 1'b, 5', 9', 1-NCOCH <sub>3</sub>                   |
| 3'                   | <i>a.</i> 2.90, dd (13.5, 8.1)<br><i>b.</i> 2.86, dd (13.5, 6.6) | 34.9                | 2'<br>2'           | 1', 2', 4', 5', 9'<br>1', 2', 4', 5', 9' | 3'b, 5', 9'<br>3'a, 1'a, 5', 9'                          |
| 4'                   | -                                                                | 132.5               | -                  | -                                        | -                                                        |
| 5'                   | 6.54, d (1.2)                                                    | 103.3               | 9'                 | 3', 9', 7', 6'                           | 1'ab, 2', 3'ab, 1-NCOCH <sub>3</sub>                     |
| 6'                   | -                                                                | 148.3               | -                  | -                                        | -                                                        |
| 7'                   | -                                                                | 133.0               | -                  | -                                        | -                                                        |
| 8'                   | -                                                                | 143.0               | -                  | -                                        | -                                                        |
| 9'                   | 6.55, d (1.2)                                                    | 109.0               | 5'                 | 3', 5', 7', 8'                           | 1', 2', 3'ab, 8'-OCH <sub>3</sub> , 1-NCOCH <sub>3</sub> |
| 1''                  | -                                                                | 163.9               | -                  | -                                        | -                                                        |
| 2''                  | -                                                                | 127.4               | -                  | -                                        | -                                                        |
| 3''                  | -                                                                | 140.3 <sup>A</sup>  | -                  | -                                        | -                                                        |
| 4''                  | 6.60, d (7.8)                                                    | 126.9 <sup>B</sup>  | 5''                | 3, 2'', 6''                              | 3                                                        |
| 5''                  | 7.44, m                                                          | 132.3               | 4'', 6''           | 3'', 7''                                 | -                                                        |
| 6''                  | 7.39, m                                                          | 127.0 <sup>B</sup>  | 5'', 7''           | 2'', 4'', 7''                            | -                                                        |
| 7''                  | 8.04, dd (7.7, 1.4)                                              | 127.6               | 6''                | 1'', 3'', 5'', 6''                       | -                                                        |
| 1-NCO                | -                                                                | 168.4               | -                  | -                                        | -                                                        |
| 1-NCOCH <sub>3</sub> | 1.70, s                                                          | 20.8                | -                  | 2', 1-NCO                                | 2', 5', 9'                                               |
| 6'-OCH <sub>2</sub>  | 5.94/5.93, AB <sub>q</sub>                                       | 101.0               | -                  | 6', 7'                                   | -                                                        |
| 8'-OCH <sub>3</sub>  | 3.79, s                                                          | 56.2                | -                  | 8'                                       | 9'                                                       |

<sup>A, B</sup> assignments with the same superscript within a column are interchangeable

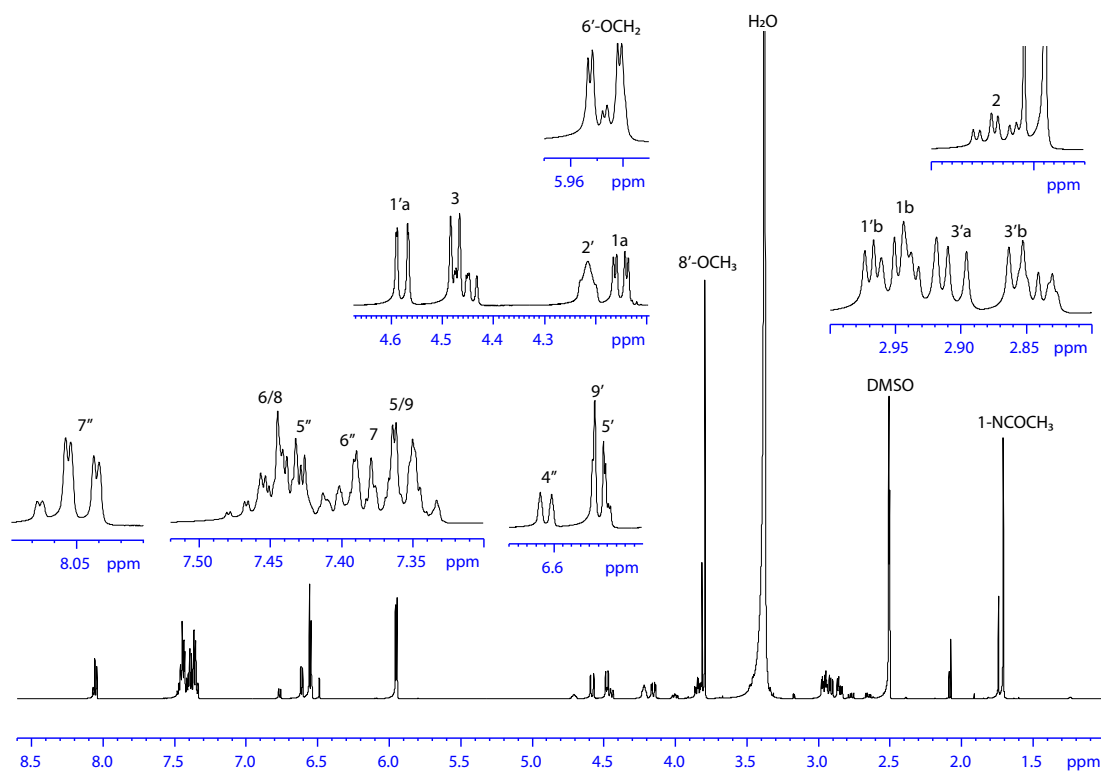

**Figure S14.**  $^1\text{H}$  NMR (600 MHz,  $\text{DMSO}-d_6$ ) spectrum for chrysosporazine T (**1**)

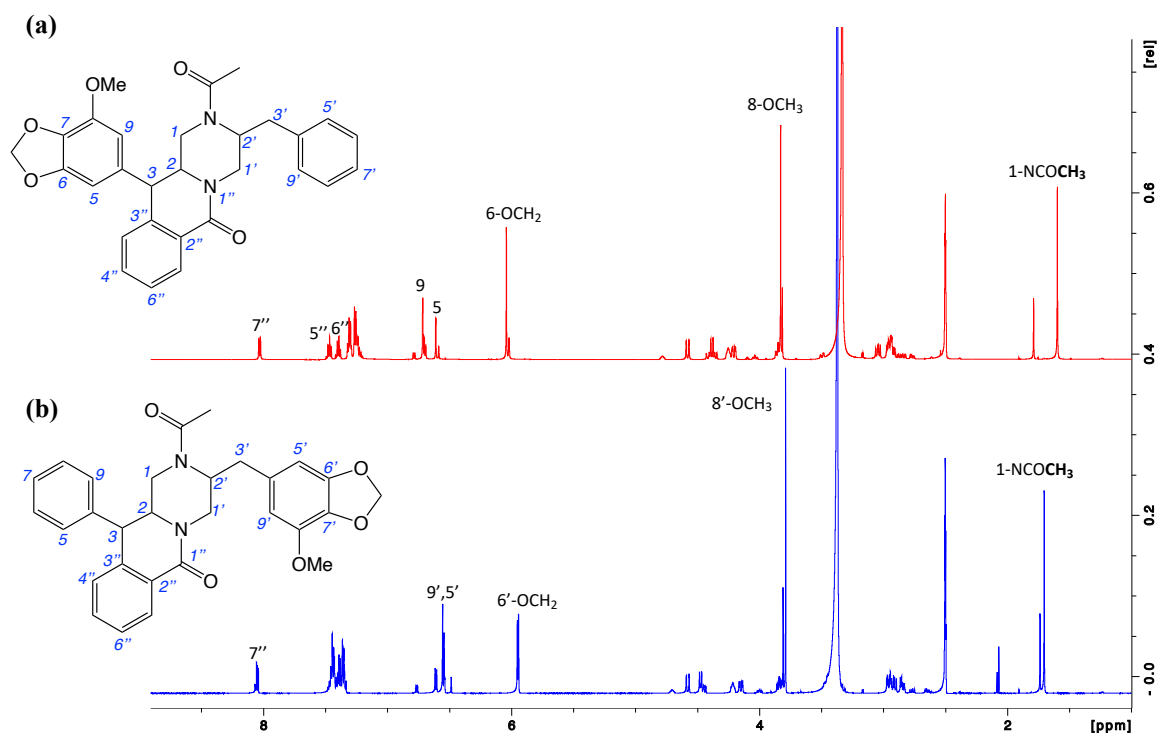

**Figure S15.** Comparison of  $^1\text{H}$  NMR (600 MHz,  $\text{DMSO}-d_6$ ) spectra of (a) chrysosporazine C (**7**) and (b) chrysosporazine T (**1**)

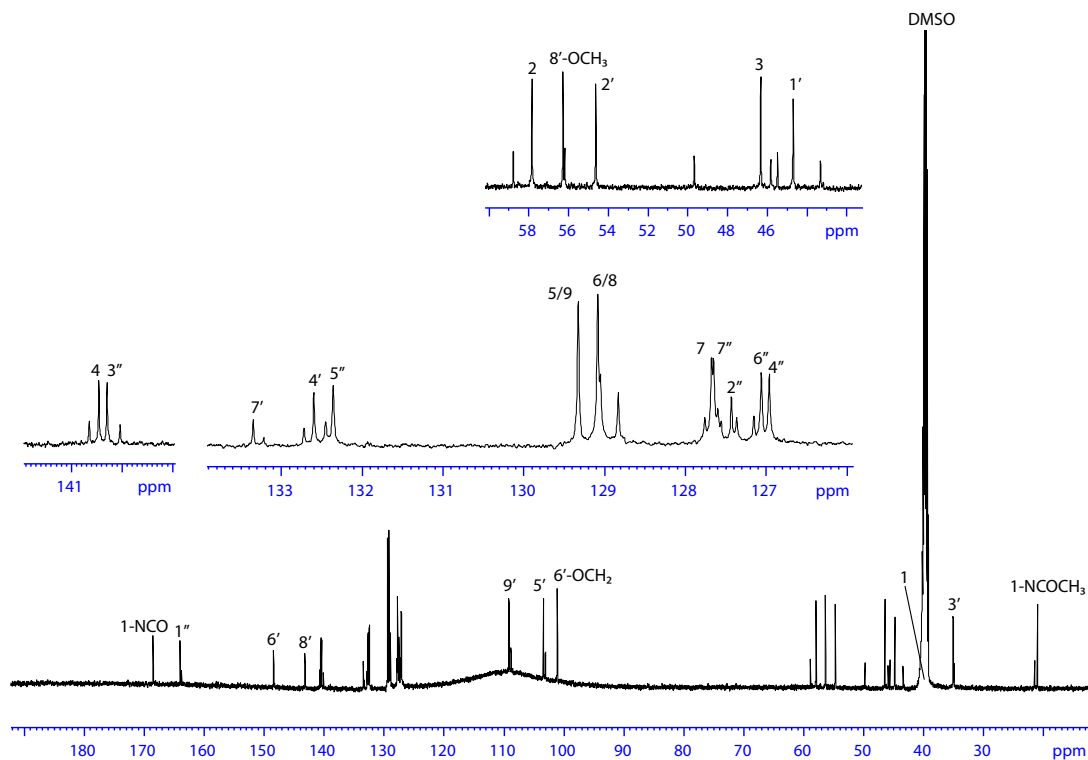

**Figure S16.**  $^{13}\text{C}$  NMR (150 MHz,  $\text{DMSO}-d_6$ ) spectrum for chrysosporazine T (**1**)

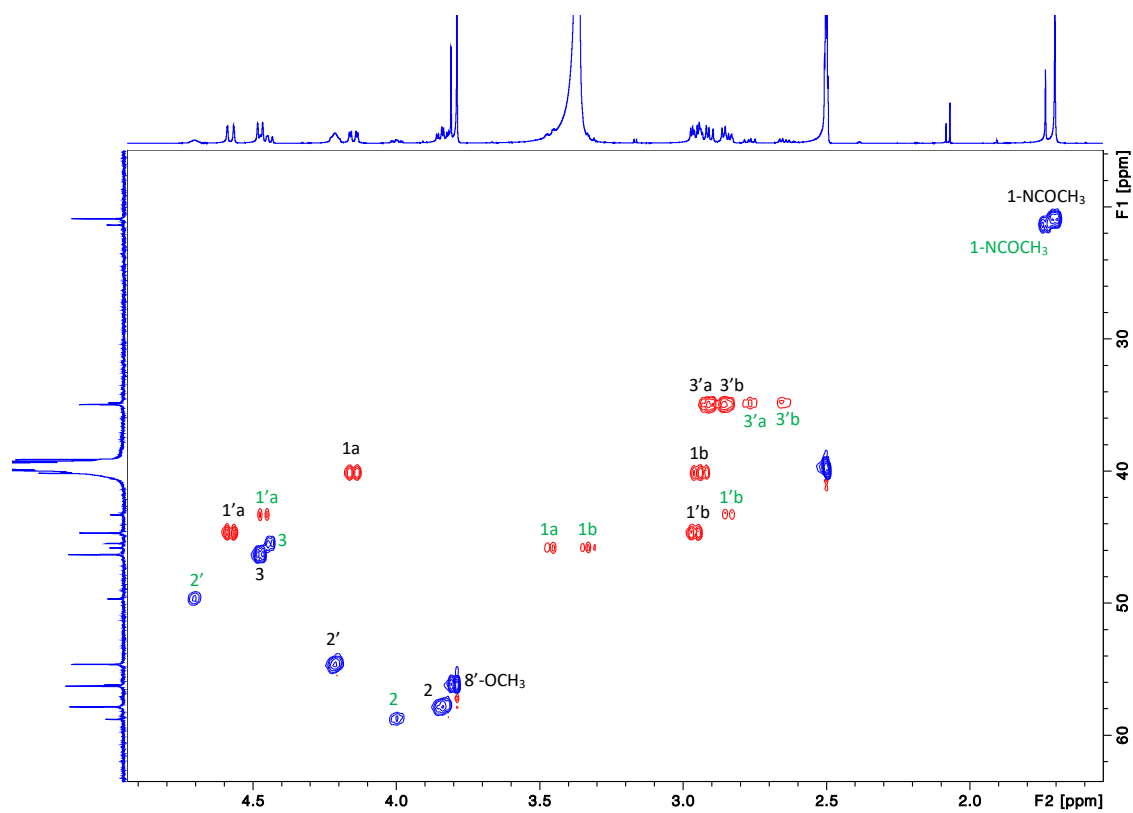

**Figure S17.** Expanded HSQC NMR (600 MHz,  $\text{DMSO}-d_6$ ) spectrum (part 1) for chrysosporazine T (**1**), major rotamer (labelled black); minor rotamer (labelled green)

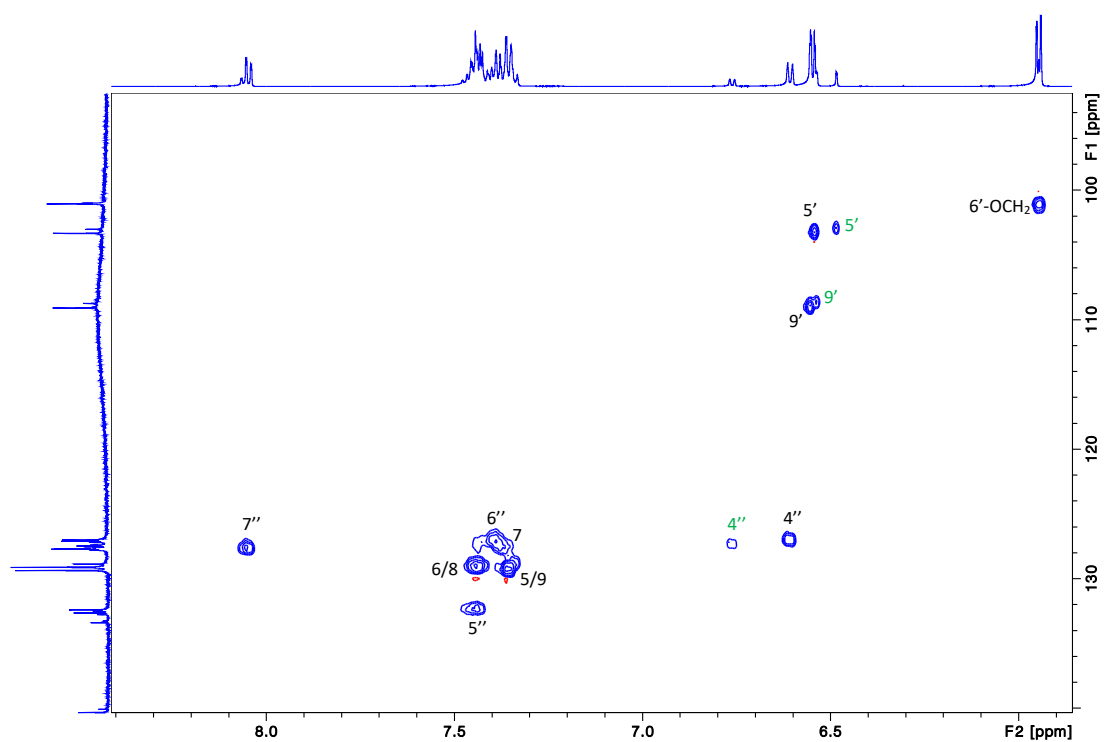

**Figure S18.** Expanded HSQC NMR (600 MHz, DMSO- $d_6$ ) spectrum (part 2) for chrysosporazine T (**1**), major rotamer (labelled black); minor rotamer (labelled green)

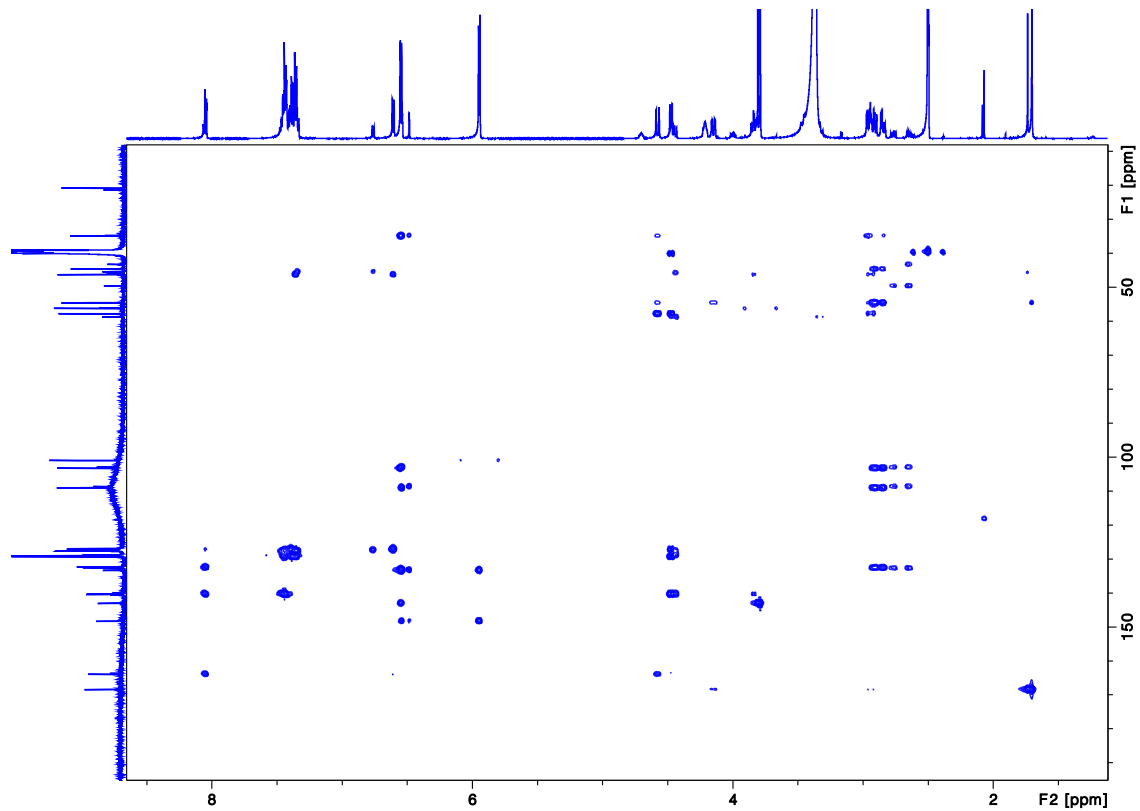

**FigureS19.** HMBC NMR (600 MHz, DMSO- $d_6$ ) spectrum for chrysosporazine T (**1**)

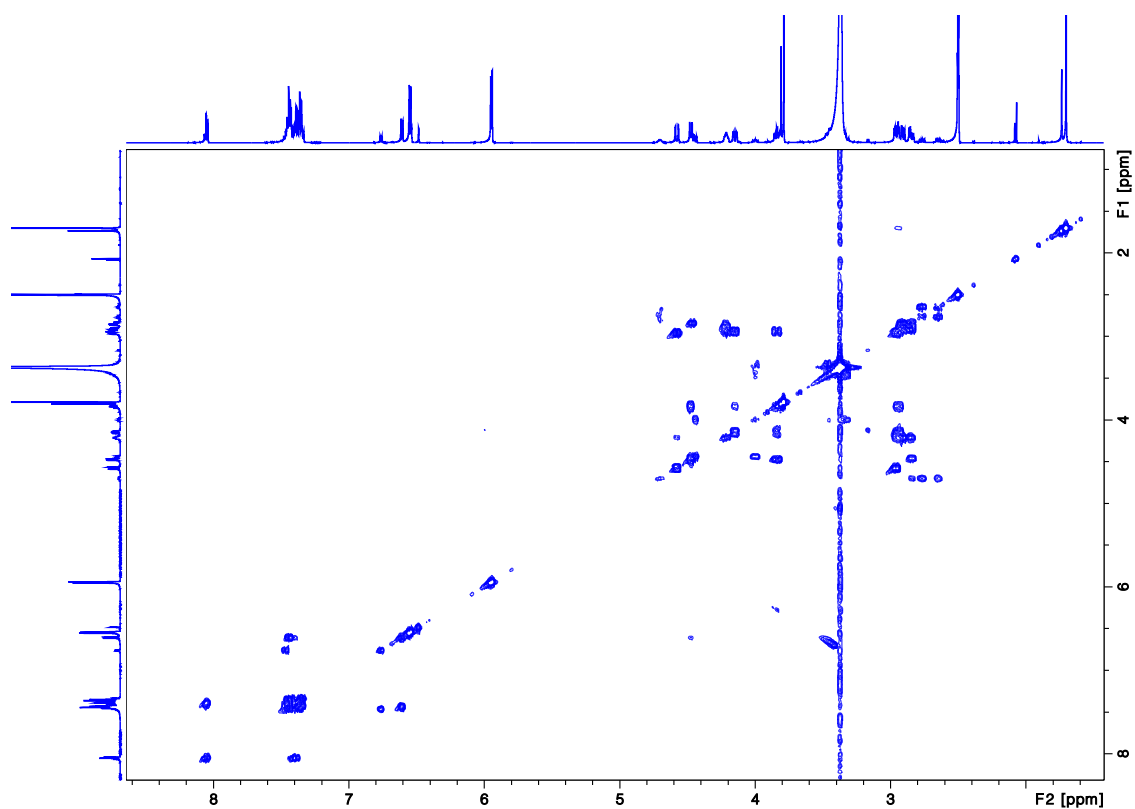

**Figure S20.** COSY NMR (600 MHz, DMSO-*d*<sub>6</sub>) spectrum for chrysosporazine T (**1**)

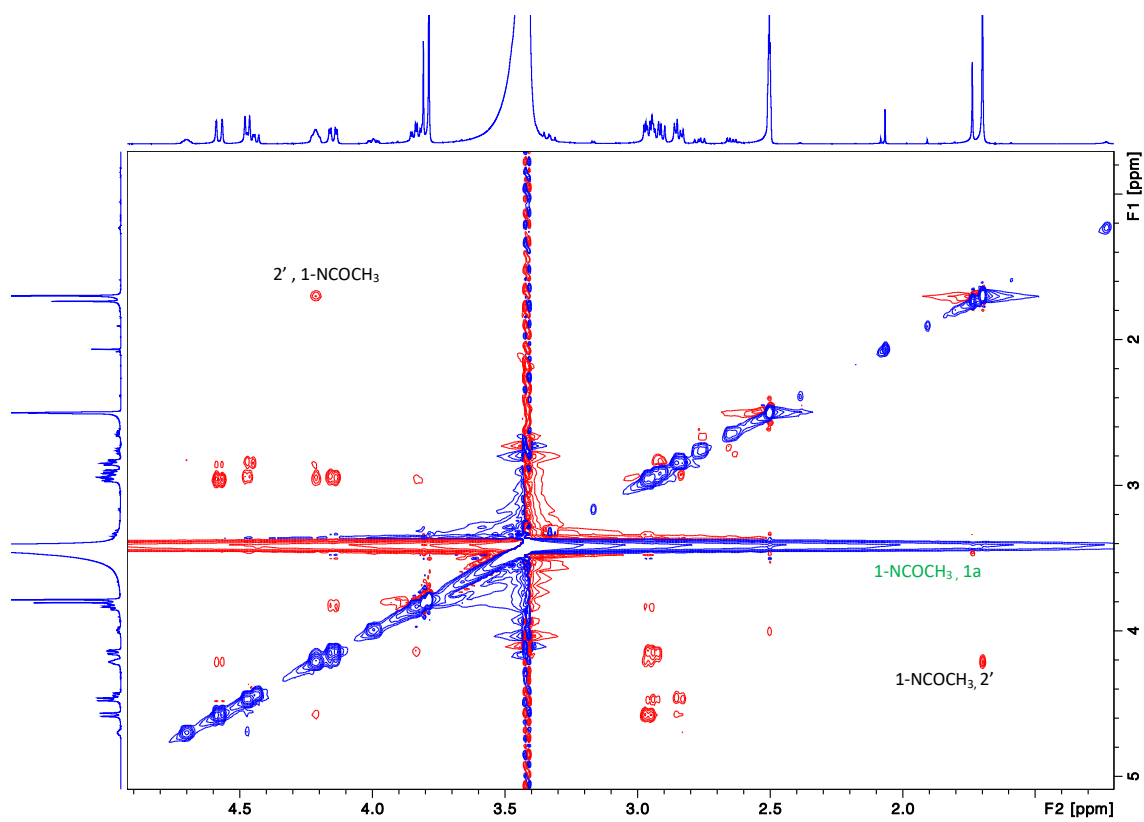

**Figure S21.** ROESY NMR (600 MHz, DMSO-*d*<sub>6</sub>) spectrum for chrysosporazine T (**1**), major rotamer (labelled black); minor rotamer (labelled green)

## 12 Chrysosporazine U (2)

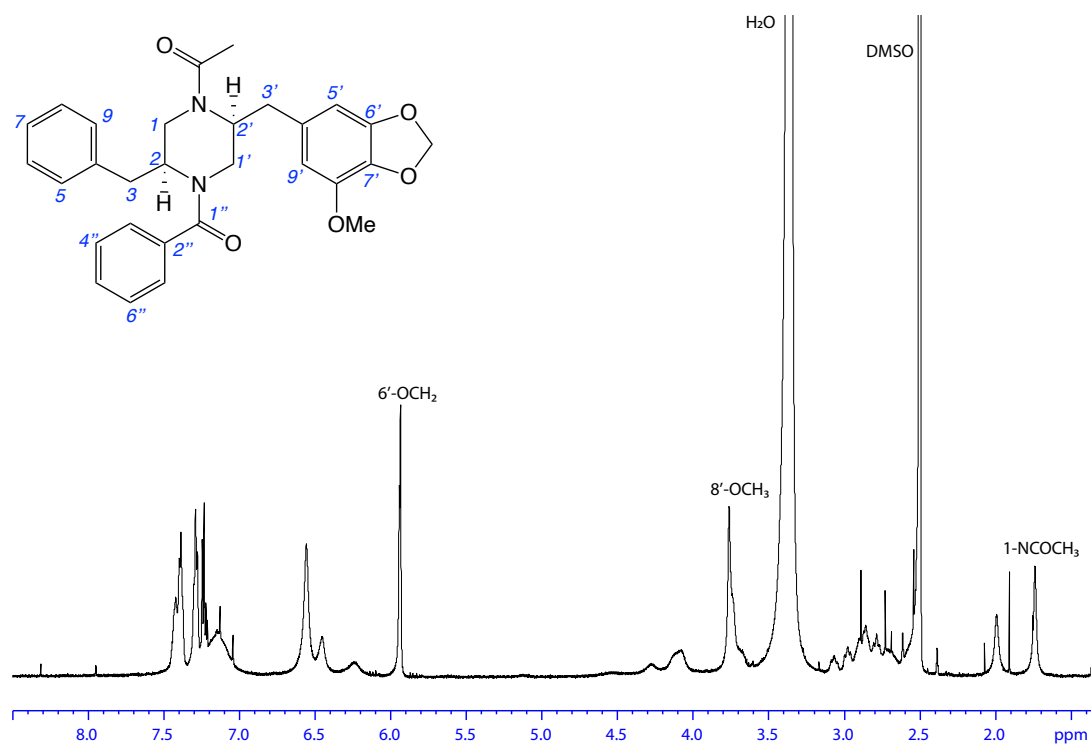

**Figure S22.**  $^1\text{H}$  NMR ( $\text{DMSO}-d_6$ ) spectrum for chrysosporazine U (2)

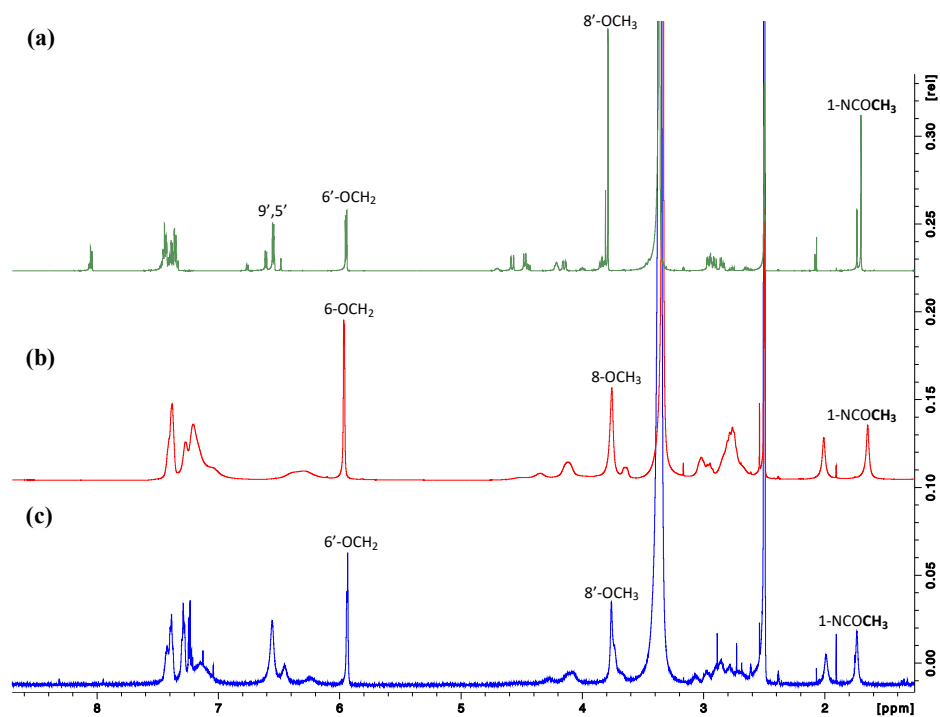

**Figure S23.**  $^1\text{H}$  NMR (600 MHz,  $\text{DMSO}-d_6$ ) spectrum for a) chrysosporazine T (1), b) chrysosporazine D (7) and chrysosporazine U (2)

### 13 Azachrysosporazine T1 (3)

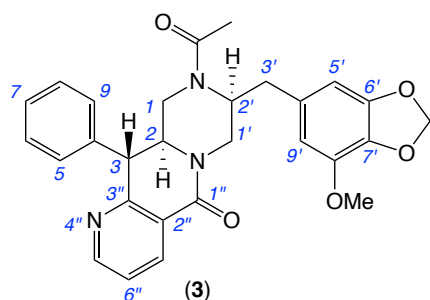

**Table S4.** 1D and 2D NMR (600 MHz, DMSO-*d*<sub>6</sub>) data for azachrysosporazine T1 (3) (major rotamer)

| Position             | $\delta_{\text{H}}$ , multi ( <i>J</i> in Hz)                    | $\delta_{\text{C}}$ | COSY               | $^1\text{H}$ - $^{13}\text{C}$ HMBC  | ROSEY                                                    |
|----------------------|------------------------------------------------------------------|---------------------|--------------------|--------------------------------------|----------------------------------------------------------|
| 1                    | <i>a.</i> 4.25, dd (13.3, 3.8)<br><i>b.</i> 3.03, m              | 40.4                | 1b, 2<br>1a, 2     | -<br>-                               | 1b, 2<br>1a                                              |
| 2                    | 3.87, ddd (11.2, 8.8, 3.8)                                       | 58.6                | 1a, 1b, 3          | -                                    | 1a, 2', 5/9                                              |
| 3                    | 4.56, d (8.8)                                                    | 48.8                | 2                  | 1, 2, 4, 5/9, 2'', 3''               | 1b, 5/9                                                  |
| 4                    | -                                                                | 140.7               | -                  | -                                    | -                                                        |
| 5/9                  | 7.26, m                                                          | 129.3               | 6/8                | 3, 7, 5/9                            | 2, 3, 1b                                                 |
| 6/8                  | 7.35, m                                                          | 128.6               | 5/9                | 4, 6/8                               | -                                                        |
| 7                    | 7.29, m                                                          | 127.1               | 6/8                | 5/9                                  | -                                                        |
| 1'                   | <i>a.</i> 4.56, m<br><i>b.</i> 3.01, m                           | 45.0                | 1'b, 2'<br>1'a, 2' | 2<br>2                               | 1'b, 2', 3'ab, 5', 9'<br>1'a, 2', 5', 9'                 |
| 2'                   | 4.21, m                                                          | 54.9                | 1'b, 3'ab          | -                                    | 1'a, 1'b, 5', 9', 2, 1-NCOCH <sub>3</sub>                |
| 3'                   | <i>a.</i> 2.88, dd (13.5, 8.3)<br><i>b.</i> 2.83, dd (13.5, 6.3) | 35.0                | 3'b, 2'<br>3'a, 2' | 1', 2', 4', 5', 9'<br>2', 4', 5', 9' | 1'a, 5', 9'<br>1'a, 5', 9'                               |
| 4'                   | -                                                                | 132.6               | -                  | -                                    | -                                                        |
| 5'                   | 6.54, d (1.3)                                                    | 103.4               | 9'                 | 3', 9', 7', 6'                       | 1', 2', 3'ab, 1-NCOCH <sub>3</sub>                       |
| 6'                   | -                                                                | 148.2               | -                  | -                                    | -                                                        |
| 7'                   | -                                                                | 133.4               | -                  | -                                    | -                                                        |
| 8'                   | -                                                                | 143.1               | -                  | -                                    | -                                                        |
| 9'                   | 6.55, d (1.3)                                                    | 109.1               | 5'                 | 3', 5', 7', 8'                       | 1', 2', 3'ab, 8'-OCH <sub>3</sub> , 1-NCOCH <sub>3</sub> |
| 1''                  | -                                                                | 163.2               | -                  | -                                    | -                                                        |
| 2''                  | -                                                                | 122.9 <sup>A</sup>  | -                  | -                                    | -                                                        |
| 3''                  | -                                                                | 158.4               | -                  | -                                    | -                                                        |
| N                    |                                                                  |                     |                    |                                      |                                                          |
| 5''                  | 8.57, dd (4.7, 1.8)                                              | 152.6               | 6''                | ND                                   | -                                                        |
| 6''                  | 7.44, ddd (7.8, 4.7)                                             | 122.8 <sup>A</sup>  | 5'', 7''           | ND                                   | -                                                        |
| 7''                  | 8.34, dd (7.8, 1.8)                                              | 135.6               | 6''                | 1'', 3'', 5''                        | -                                                        |
| 1-NCO                | -                                                                | 168.6               | -                  | -                                    | -                                                        |
| 1-NCOCH <sub>3</sub> | 1.68, s                                                          | 20.8                | -                  | 1-NCO                                | 2', 5', 9'                                               |
| 6'-OCH <sub>2</sub>  | 5.95/5.93, AB <sub>q</sub>                                       | 101.0               | -                  | 6', 7'                               | -                                                        |
| 8'-OCH <sub>3</sub>  | 3.78, s                                                          | 56.3                | -                  | 8'                                   | 9'                                                       |

<sup>A</sup> assignments with the same superscript within a column are interchangeable

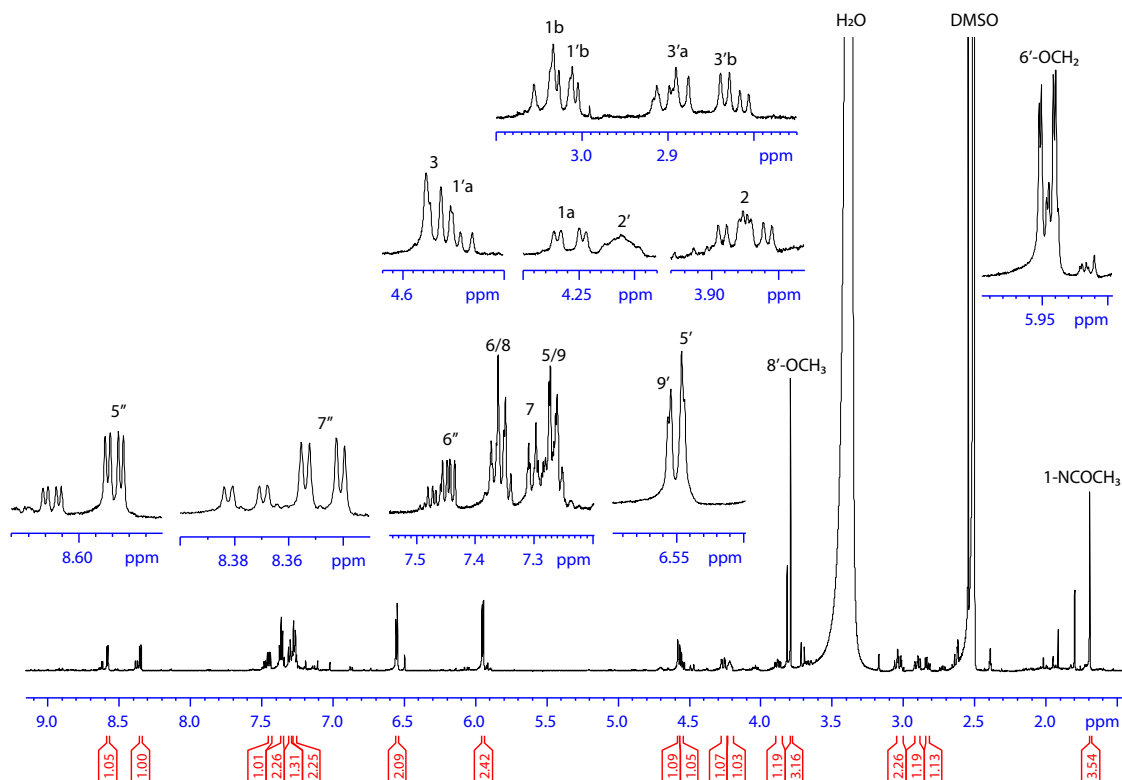

**Figure S24.** <sup>1</sup>H NMR (600 MHz, DMSO-*d*<sub>6</sub>) spectrum for azachrysosporazine T1 (3)

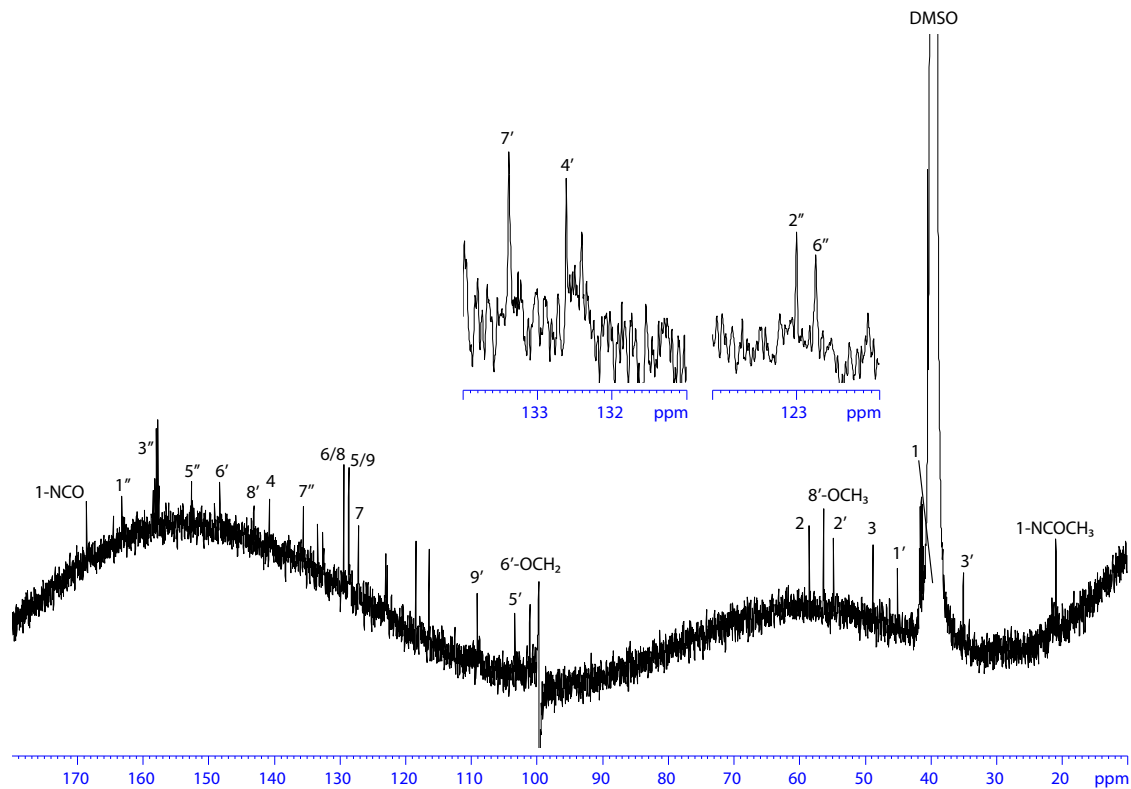

**Figure S25.** <sup>13</sup>C NMR (150 MHz, DMSO-*d*<sub>6</sub>) spectrum for azachrysosporazine T1 (3)



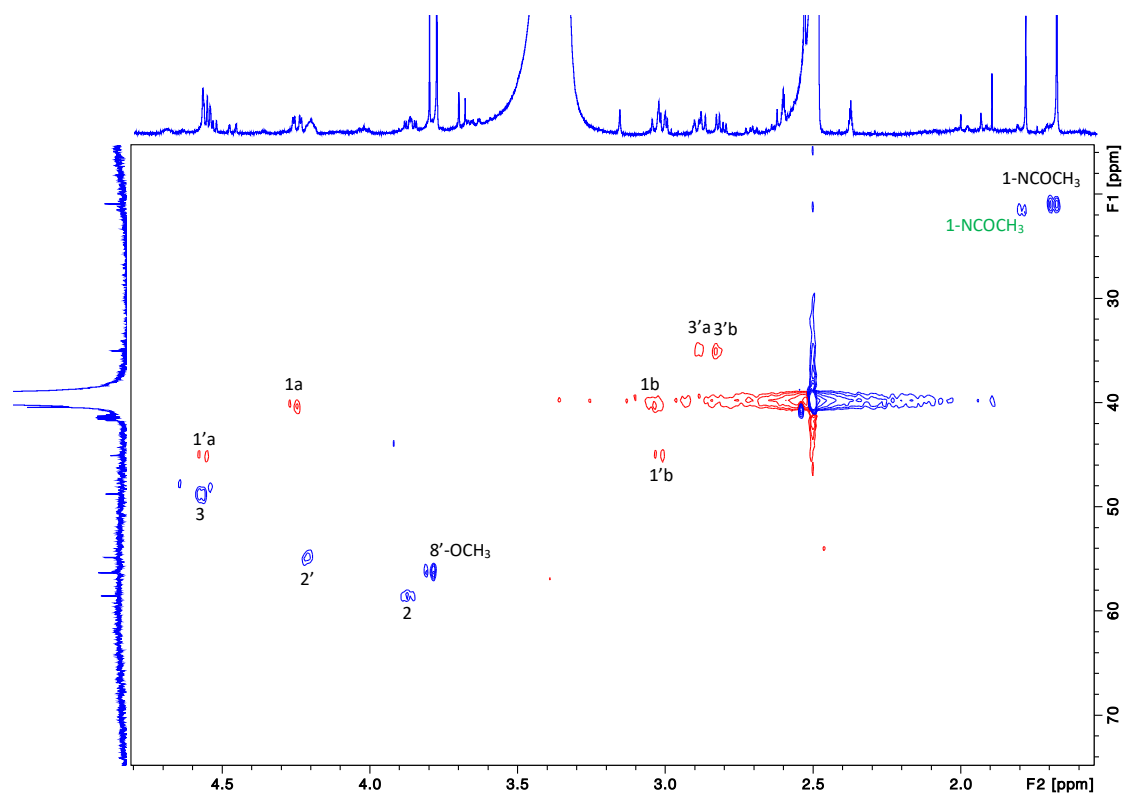

**Figure S26.** Expanded HSQC NMR (600 MHz, DMSO- $d_6$ ) spectrum (part 1) for azachrysosporazine T1 (**3**), major rotamer (labelled black); minor rotamer (labelled green)

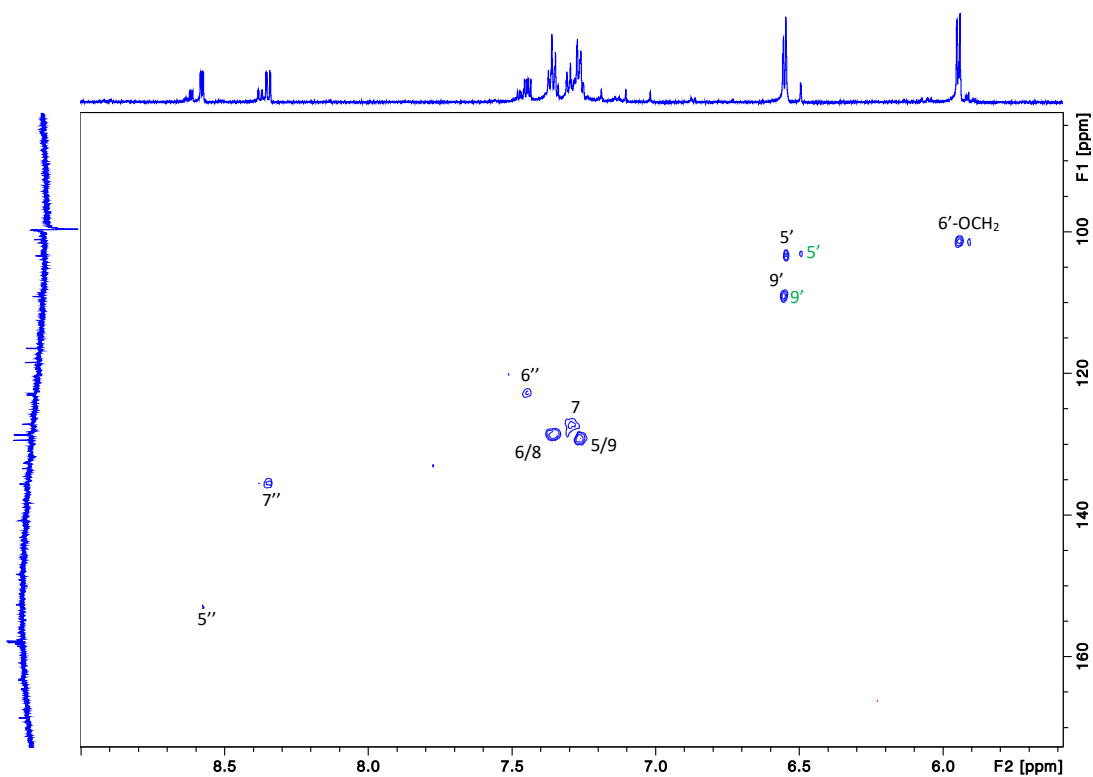

**Figure S27.** Expanded HSQC NMR (600 MHz, DMSO- $d_6$ ) spectrum (part 2) for azachrysosporazine T1 (**3**), major rotamer (labelled black); minor rotamer (labelled green)

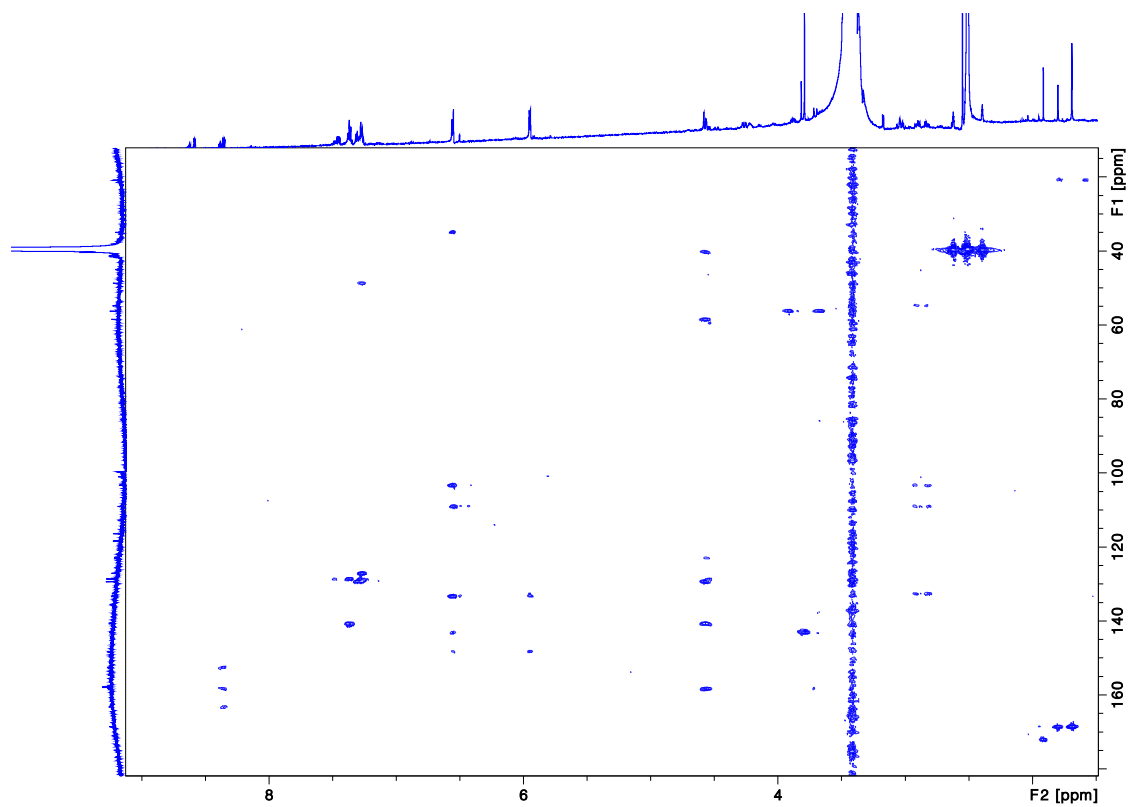

**Figure S28.** HMBC NMR (600 MHz, DMSO-*d*<sub>6</sub>) spectrum for azachrysosporazine T1 (3)

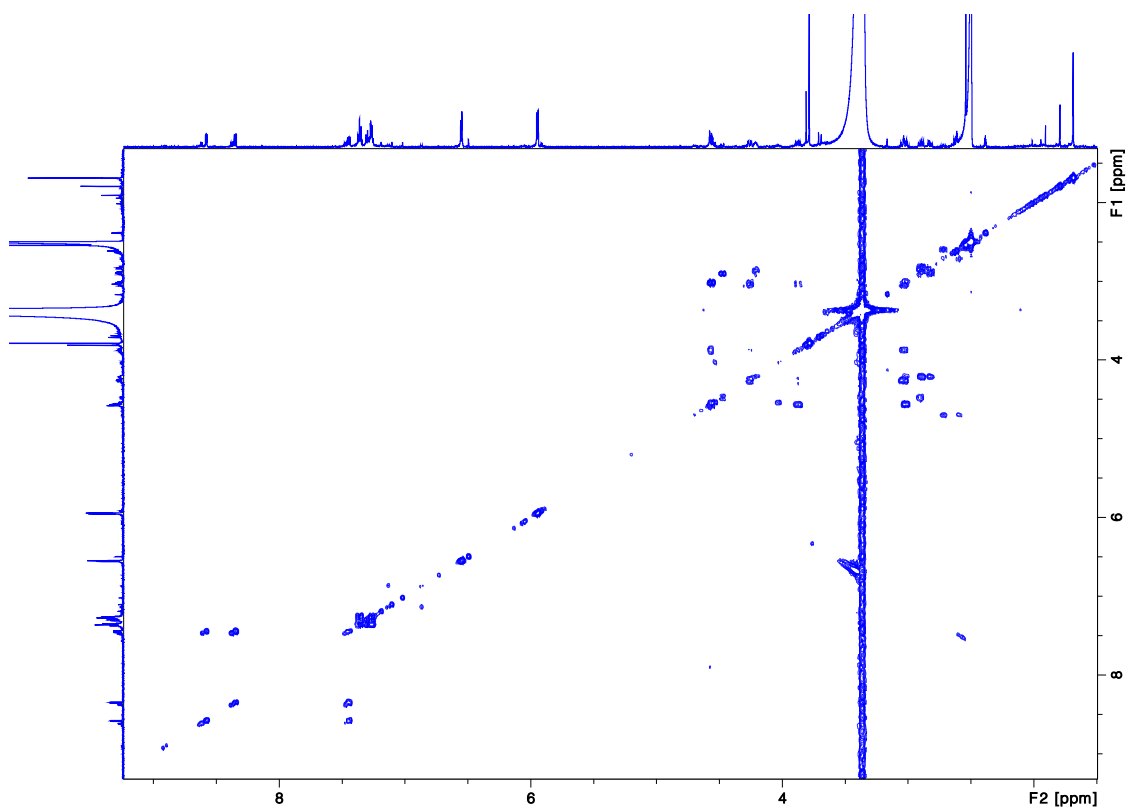

**Figure S29.** COSY NMR (600 MHz, DMSO-*d*<sub>6</sub>) spectrum for azachrysosporazine T1 (3)

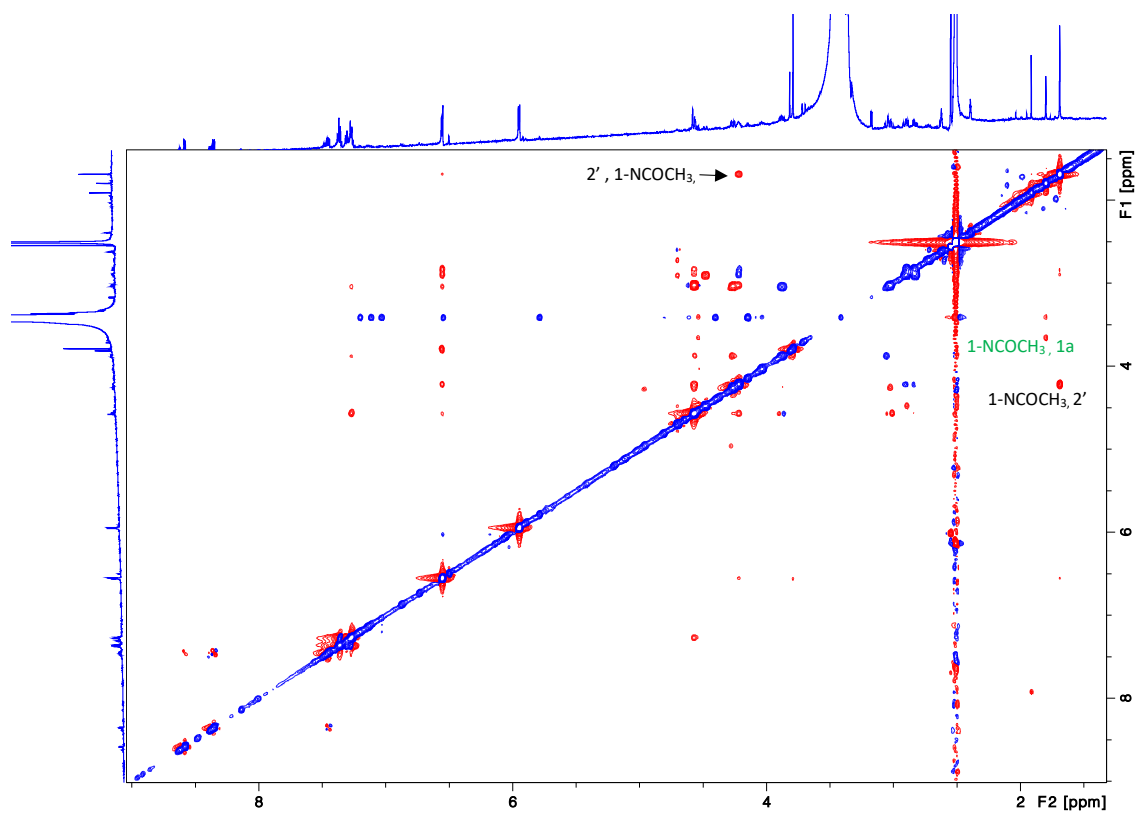

**Figure S30.** ROESY NMR (600 MHz, DMSO- $d_6$ ) spectrum for azachrysosporazine T1 (**3**), major rotamer (labelled black); minor rotamer (labelled green)

## 14 Azachrysosporazine U1 (4)

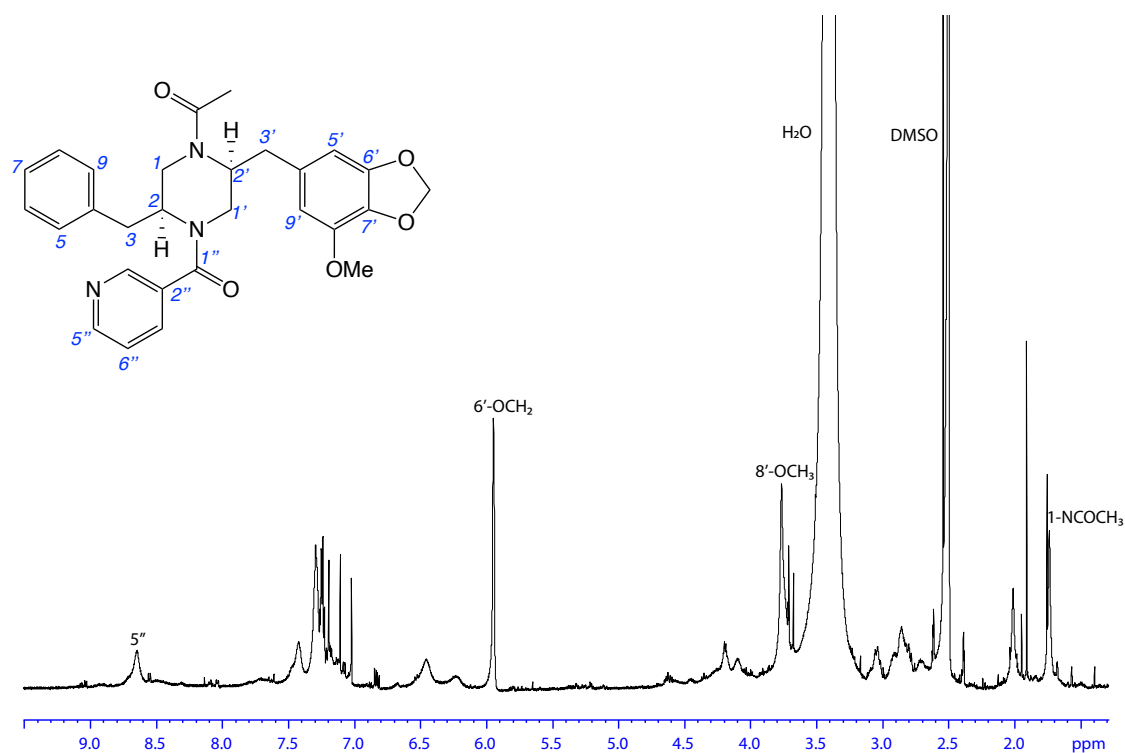

Figure S31.  $^1\text{H}$  NMR ( $\text{DMSO}-d_6$ ) spectrum for azachrysosporazine U1 (4)

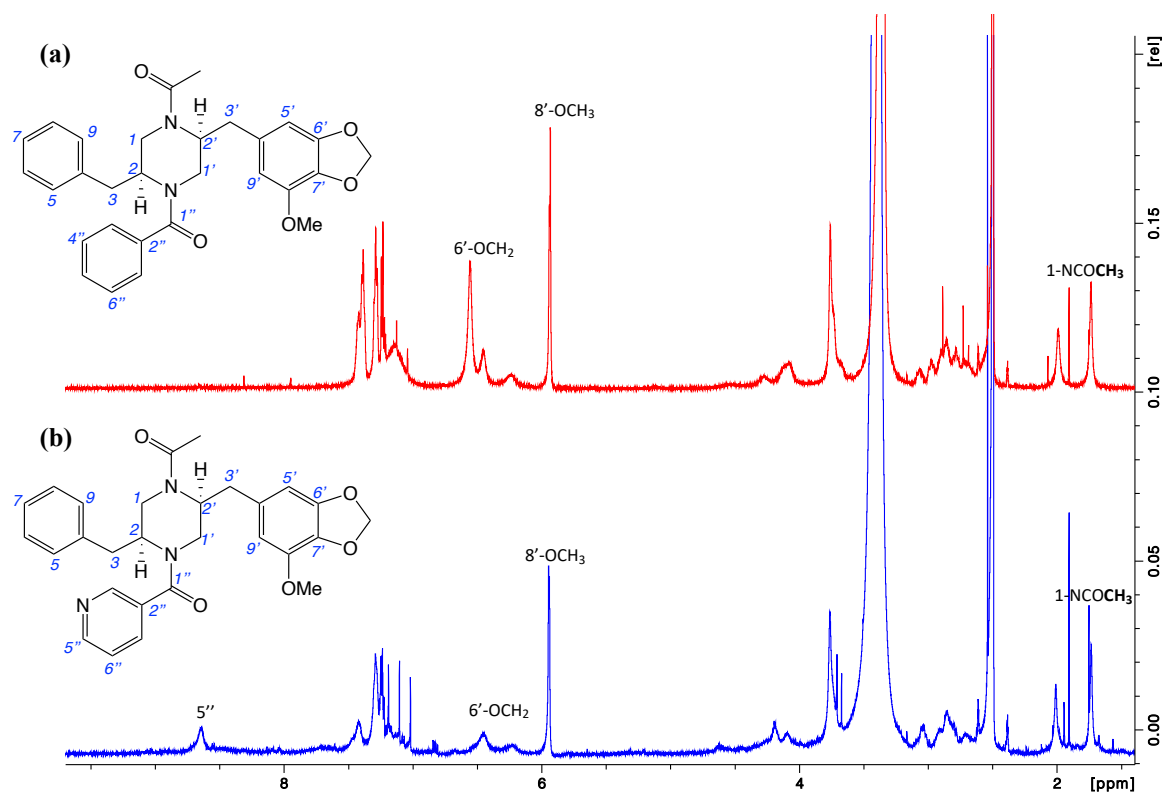

Figure S32.  $^1\text{H}$  NMR (600 MHz,  $\text{DMSO}-d_6$ ) spectrum for a) chrysosporazine U (2), b) azachrysosporazine U1 (4)

## 15 Neochrysozporazine R (5)

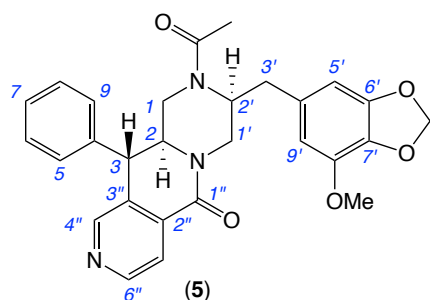

**Table S5.** 1D and 2D NMR (600 MHz, DMSO-*d*<sub>6</sub>) data for neochrysozporazine R (5) (major rotamer)

| Position             | $\delta_{\text{H}}$ , multi ( <i>J</i> in Hz)                    | $\delta_{\text{C}}$ | COSY           | $^1\text{H}$ - $^{13}\text{C}$ HMBC  | ROSEY                                        |
|----------------------|------------------------------------------------------------------|---------------------|----------------|--------------------------------------|----------------------------------------------|
| 1                    | <i>a.</i> 4.19, dd (14.5, 4.0)<br><i>b.</i> 2.98, m              | 40.1                | 1b, 2<br>1a, 2 | -<br>-                               | 1b, 2, 5/9<br>1a, 2                          |
| 2                    | 3.92, ddd (14.5, 10.3, 3.7)                                      | 58.2                | 1a, 1b, 3      | -                                    | 1a, 1b, 5/9                                  |
| 3                    | 4.56, d (10.3)                                                   | 43.7                | 2, 4''         | 1, 2, 4, 5/9, 2'', 3'', 4''          | 1b, 5/9                                      |
| 4                    | -                                                                | 139.4               | -              | -                                    | -                                            |
| 5/9                  | 7.40, m                                                          | 129.2 <sup>A</sup>  | 6/8            | 3, 7, 5/9                            | 1b, 2, 3                                     |
| 6/8                  | 7.46, m                                                          | 129.1 <sup>A</sup>  | 5/9            | 4, 6/8                               | -                                            |
| 7                    | 7.40, m                                                          | 127.9               | 6/8            | 5/9                                  | -                                            |
| 1'                   | <i>a.</i> 4.55, dd (13.4, 1.3)<br><i>b.</i> 2.99, m              | 44.8                | 1'b<br>1'a, 2' | 2, 1''<br>-                          | 1'b, 2', 3'a, 3'b, 5', 9'<br>1'a, 2', 5', 9' |
| 2'                   | 4.23, m                                                          | 54.6                | 1b, 3'a, 3'b   | -                                    | 1'a, 1'b, 5', 9', 1-NCOCH <sub>3</sub>       |
| 3'                   | <i>a.</i> 2.90, dd (13.4, 8.6)<br><i>b.</i> 2.85, dd (13.4, 6.4) | 34.8                | 2'<br>2'       | 1', 2', 4', 5', 9'<br>2', 4', 5', 9' | 1'a, 5', 9'<br>1'a, 5', 9'                   |
| 4'                   | -                                                                | 132.6               | -              | -                                    | -                                            |
| 5'                   | 6.54, d (1.4)                                                    | 103.3               | 9'             | 3', 9', 7', 6'                       | 1', 2', 3', 1-NCOCH <sub>3</sub>             |
| 6'                   | -                                                                | 148.3               | -              | -                                    | -                                            |
| 7'                   | -                                                                | 133.3               | -              | -                                    | -                                            |
| 8'                   | -                                                                | 143.0               | -              | -                                    | -                                            |
| 9'                   | 6.55, d (1.4)                                                    | 109.0               | 5'             | 3', 5', 7', 8'                       | 1', 2', 3', 8'-OCH <sub>3</sub>              |
| 1''                  | -                                                                | 162.3               | -              | -                                    | -                                            |
| 2''                  | -                                                                | 134.4               | -              | -                                    | -                                            |
| 3''                  | -                                                                | 133.7               | -              | -                                    | -                                            |
| 4''                  | 7.89, s                                                          | 148.6               | 3              | 3, 2''                               | -                                            |
| N                    |                                                                  |                     |                |                                      |                                              |
| 6''                  | 8.64, d (4.7)                                                    | 148.3               | 7''            | ND                                   | -                                            |
| 7''                  | 7.88, d (4.7)                                                    | 120.2               | 6''            | 1'', 2'', 6''                        | -                                            |
| 1-NCO                | -                                                                | 168.5               | -              | -                                    | -                                            |
| 1-NCOCH <sub>3</sub> | 1.70, s                                                          | 20.8                | -              | 1-NCO                                | 2', 5'                                       |
| 6'-OCH <sub>2</sub>  | 5.95/5.94, AB <sub>q</sub>                                       | 101.0               | -              | 6', 7'                               | -                                            |
| 8'-OCH <sub>3</sub>  | 3.78, s                                                          | 56.2                | -              | 8'                                   | 9'                                           |

<sup>A</sup> assignments with the same superscript within a column are interchangeable

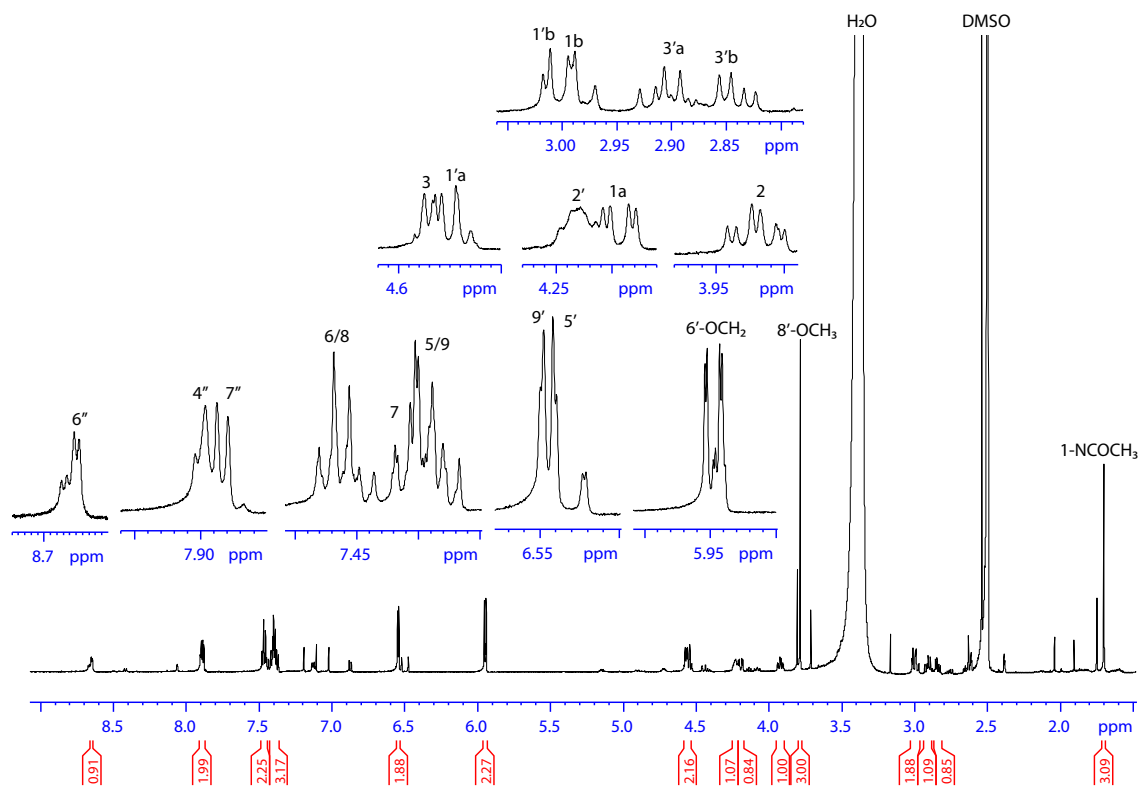

**Figure S33.** <sup>1</sup>H NMR (600 MHz, DMSO-*d*<sub>6</sub>) spectrum for neochrysosporazine R (**5**)

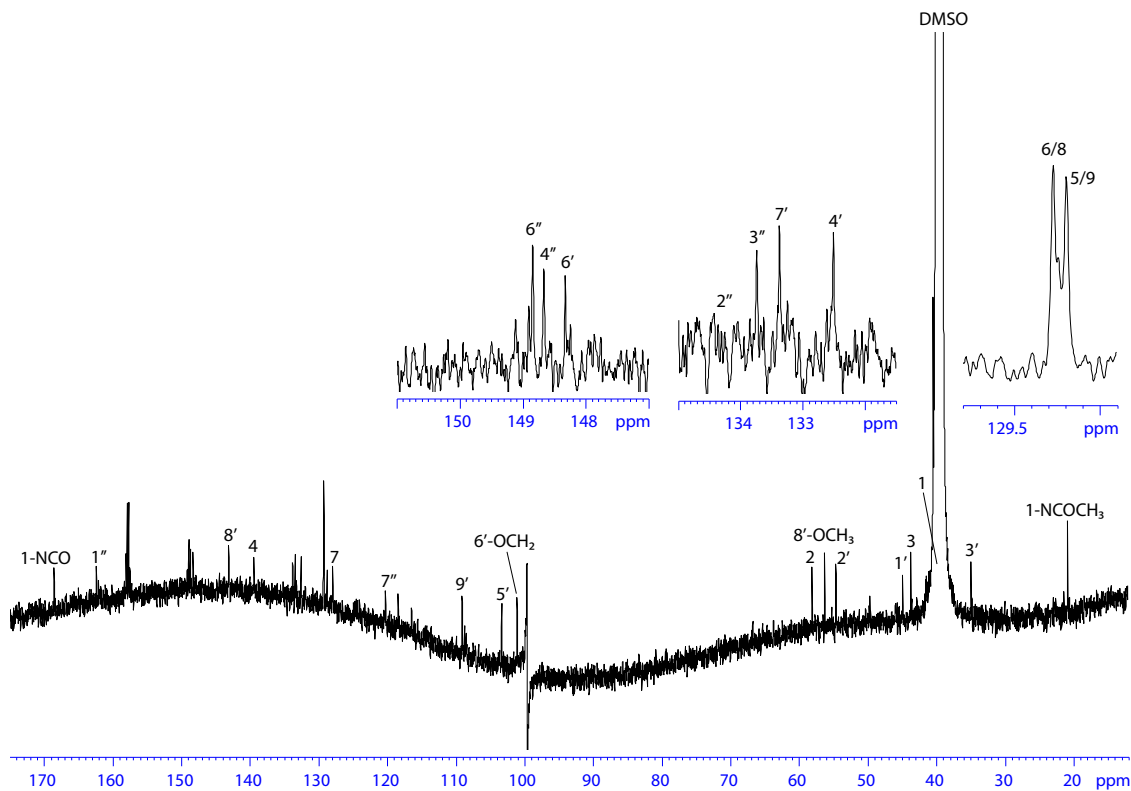

**Figure S34.** <sup>13</sup>C NMR (150 MHz, DMSO-*d*<sub>6</sub>) spectrum for neochrysosporazine R (**5**)

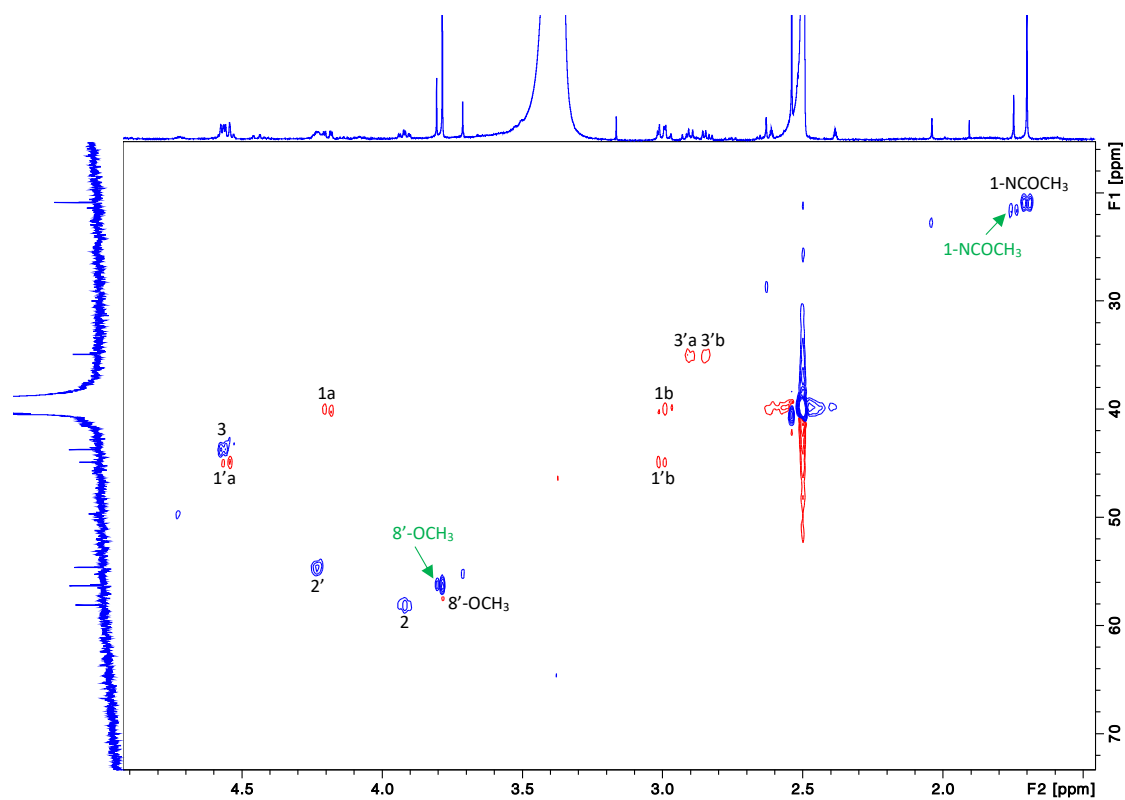

**Figure S35.** Expanded HSQC NMR (600 MHz, DMSO- $d_6$ ) spectrum (part 1) for neochrysozporazine R (**5**), major rotamer (labelled black); minor rotamer (labelled green)

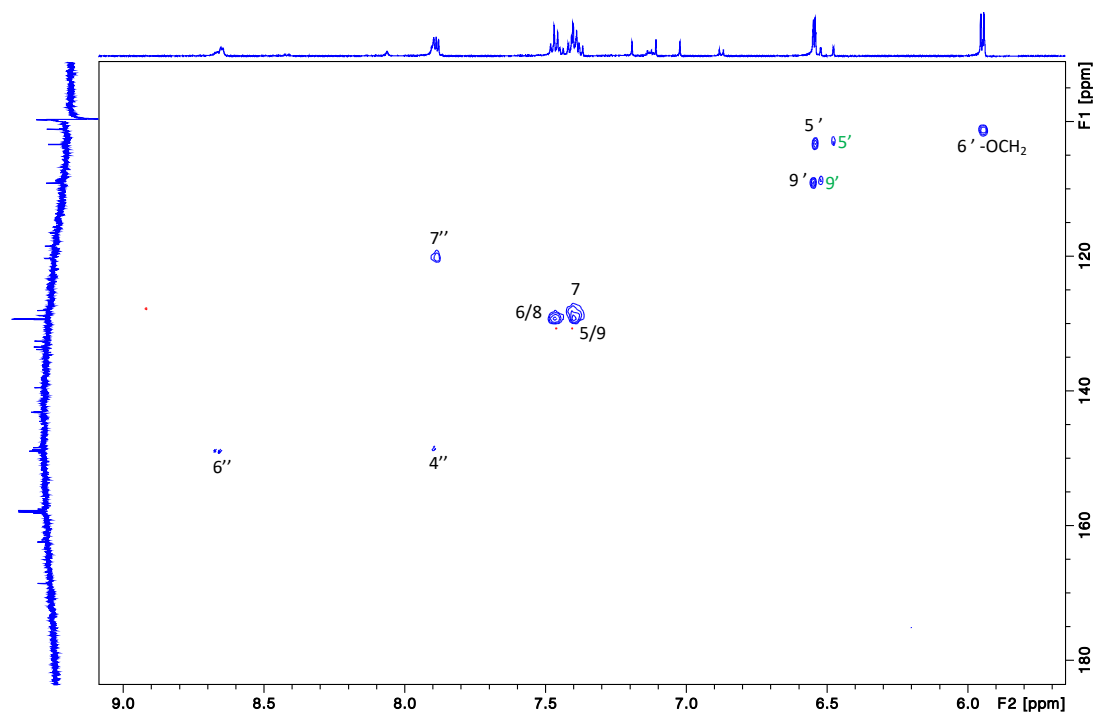

**Figure S36.** Expanded HSQC NMR (600 MHz, DMSO- $d_6$ ) spectrum (part 2) for neochrysozporazine R (**5**), major rotamer (labelled black); minor rotamer (labelled green)

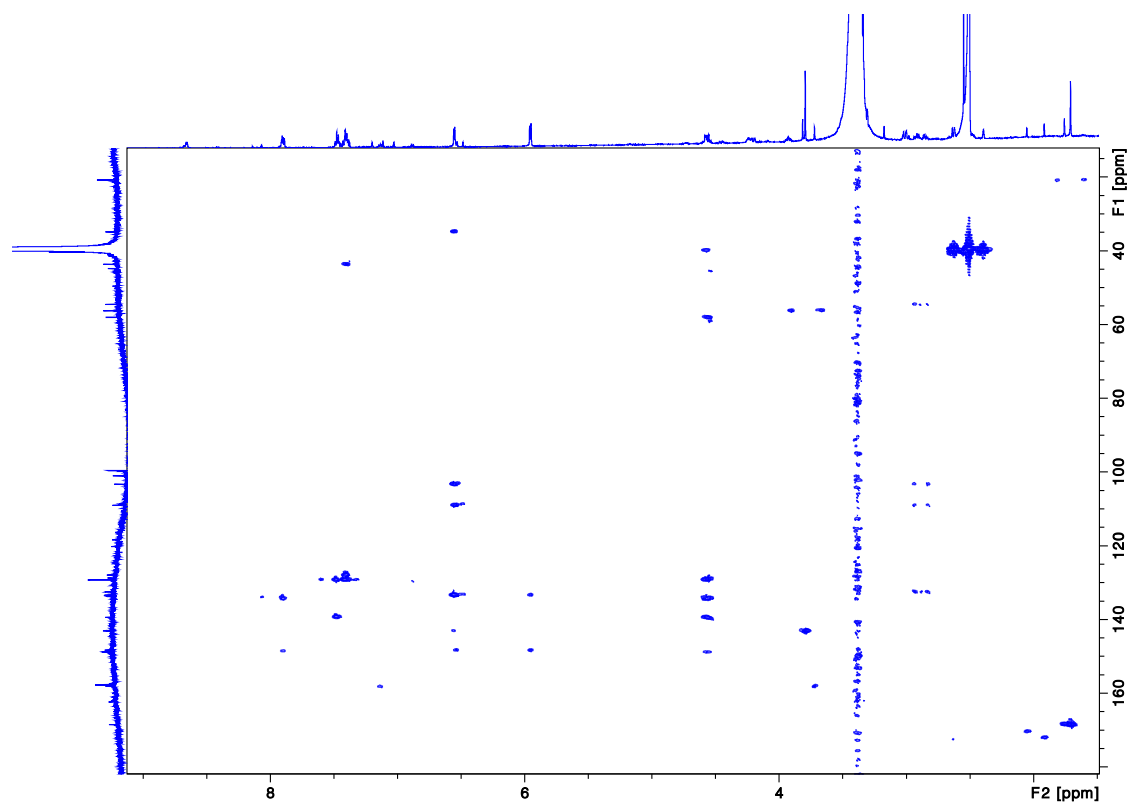

**Figure S37.** HMBC NMR (600 MHz, DMSO-*d*<sub>6</sub>) spectrum for neochrysosporazine R (**5**)

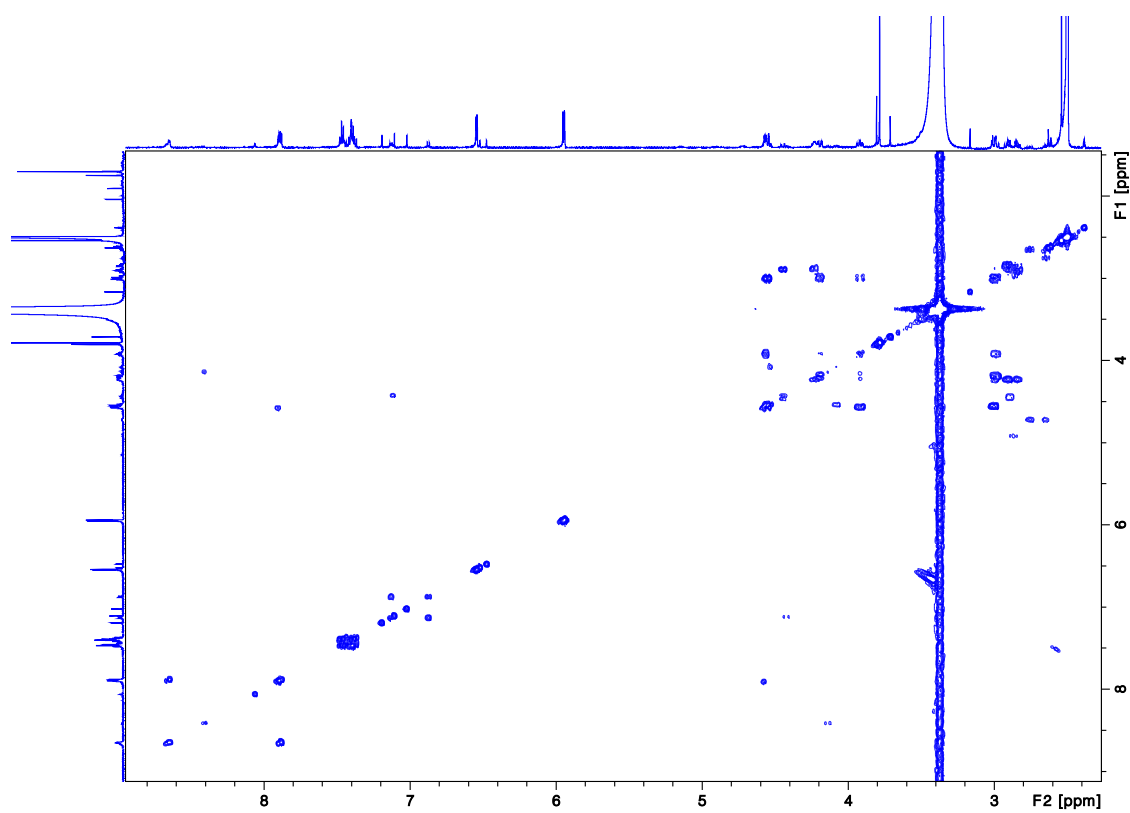

**Figure S38.** COSY NMR (600 MHz, DMSO-*d*<sub>6</sub>) spectrum for neochrysosporazine R (**5**)



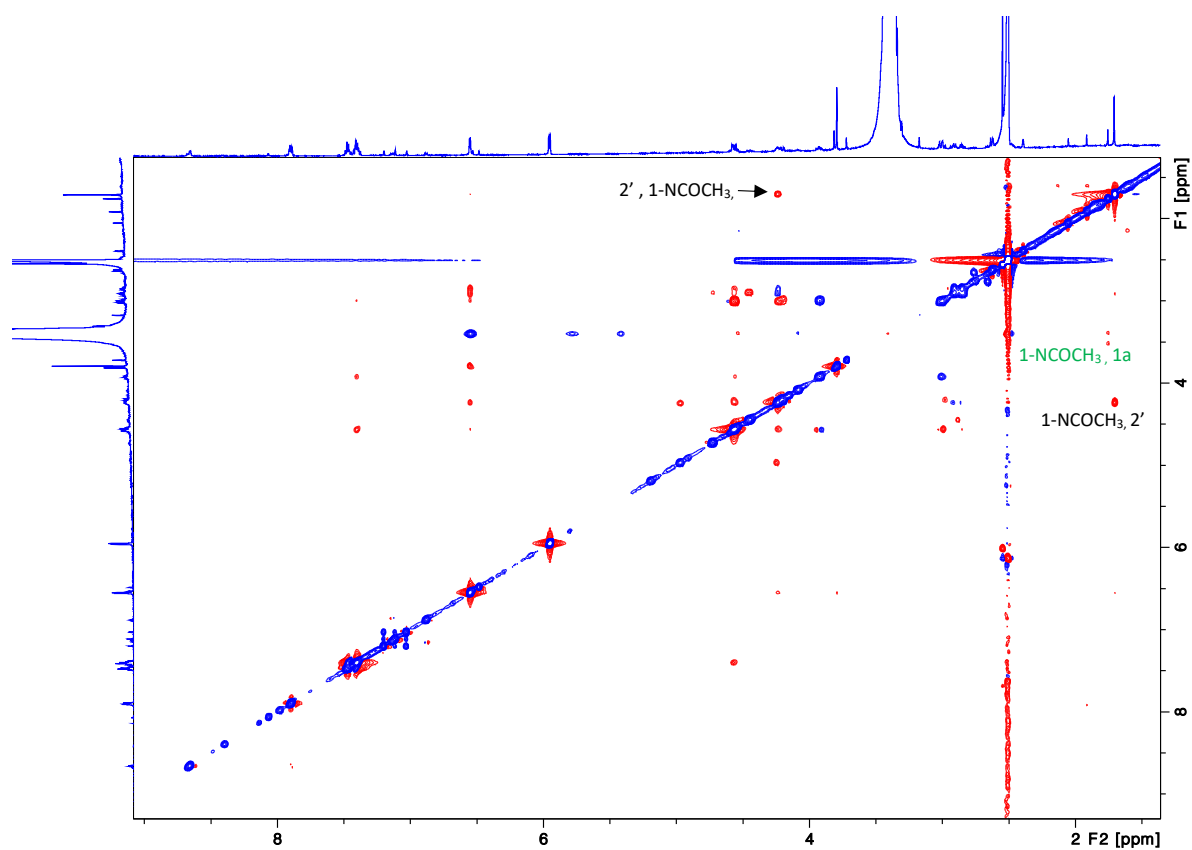

**Figure S39.** ROESY NMR (600 MHz, DMSO- $d_6$ ) spectrum for neochrysozporazine R (**5**), major rotamer (labelled black); minor rotamer (labelled green)

## 16 Neochrysozporazine S (6)

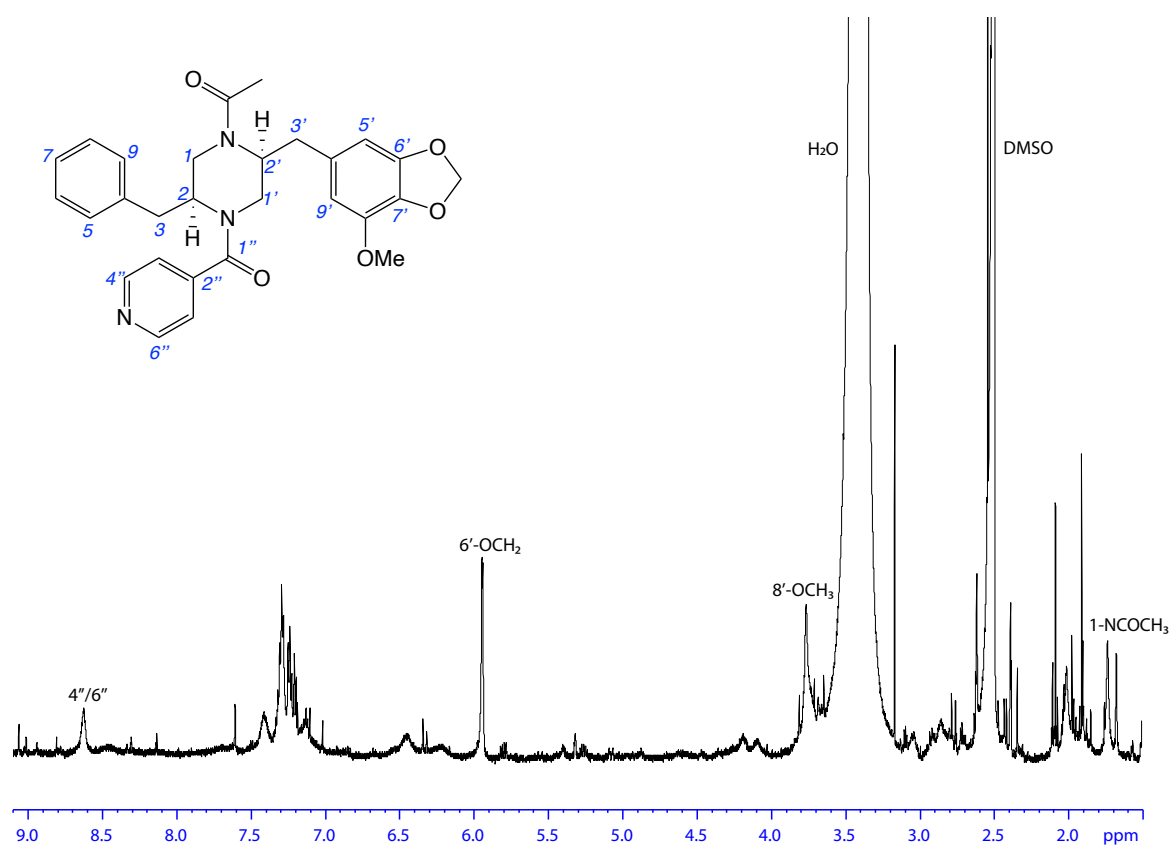

**Figure S40.**  $^1\text{H}$  NMR ( $\text{DMSO}-d_6$ ) spectrum for neochrysozporazine S (**6**)

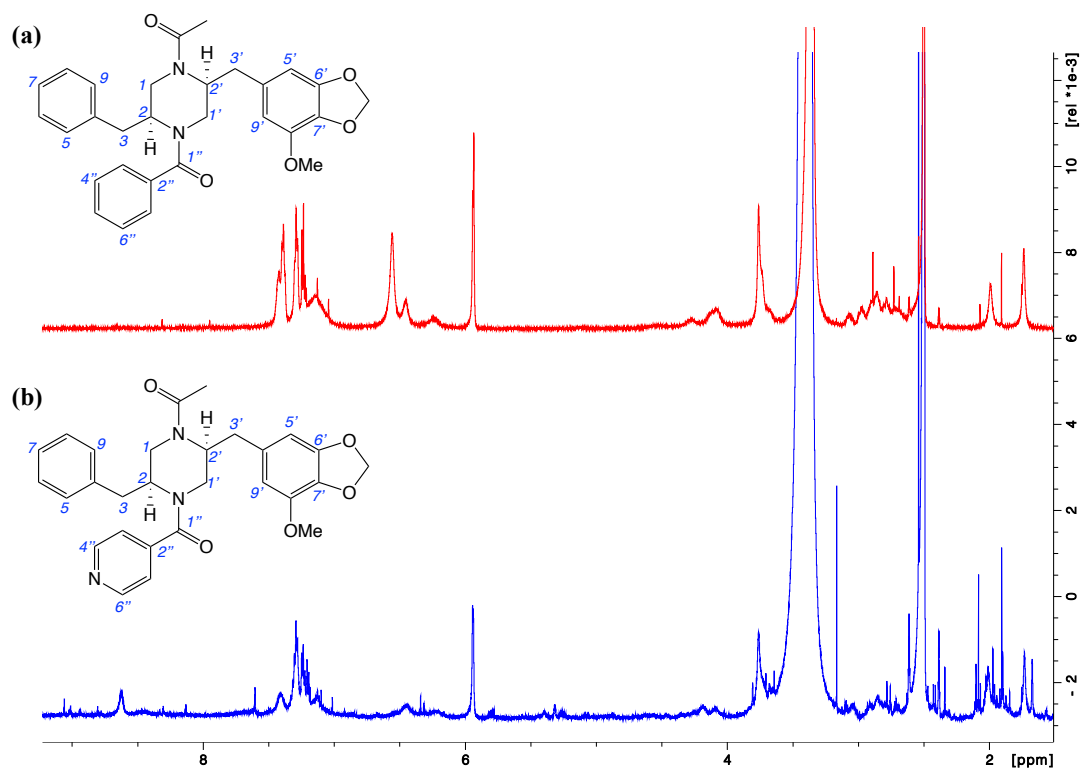

**Figure S41.**  $^1\text{H}$  NMR (600 MHz,  $\text{DMSO}-d_6$ ) spectrum for a) chrysozporazine U (**2**), b) neochrysozporazine S (**6**)

## 17 Chrysosporazine D (7)

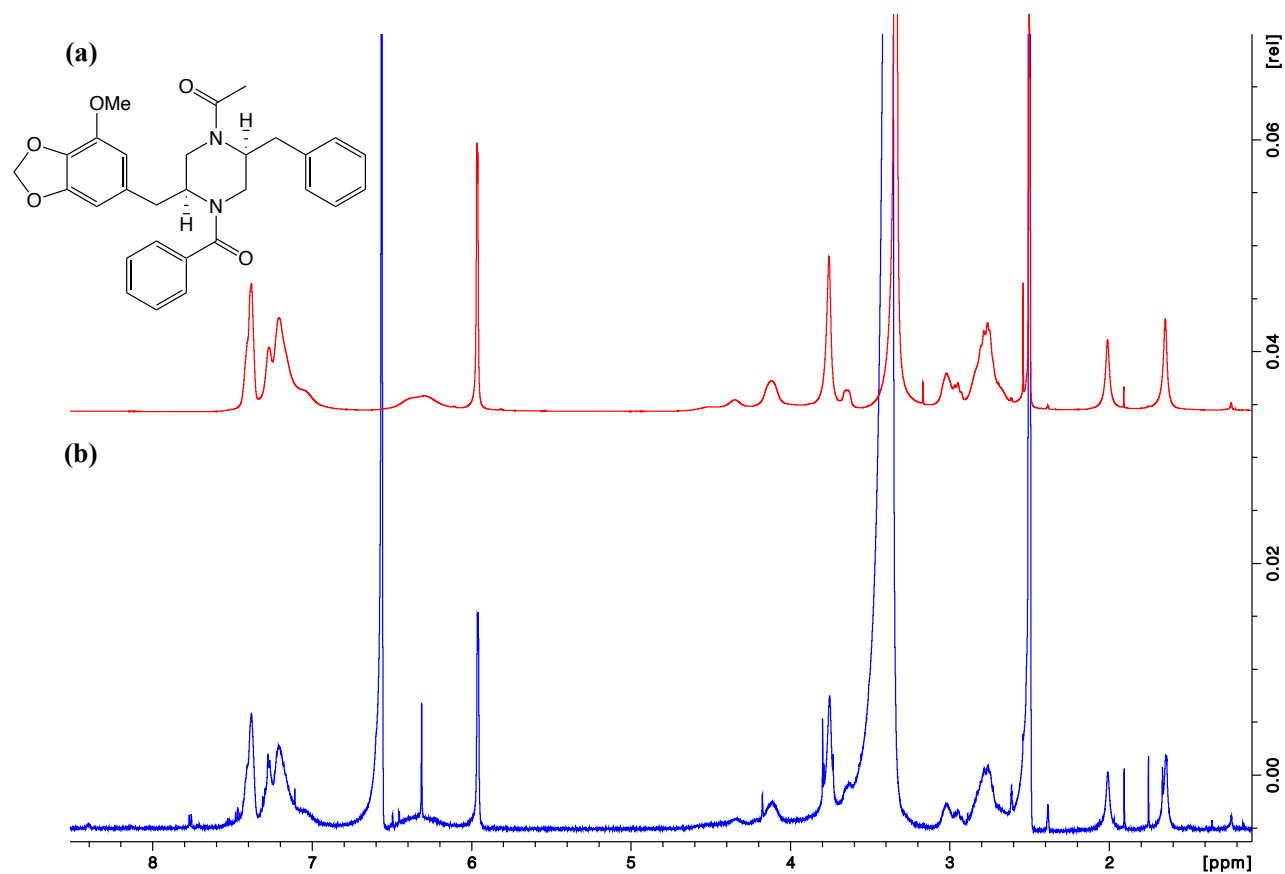

**Figure S42.** <sup>1</sup>H NMR (600 MHz, DMSO-*d*<sub>6</sub>) spectrum for (a) known chrysosporazine D (7), (b) CMB-F455 isolated (7)

## 18 Brasiliamide A (8)

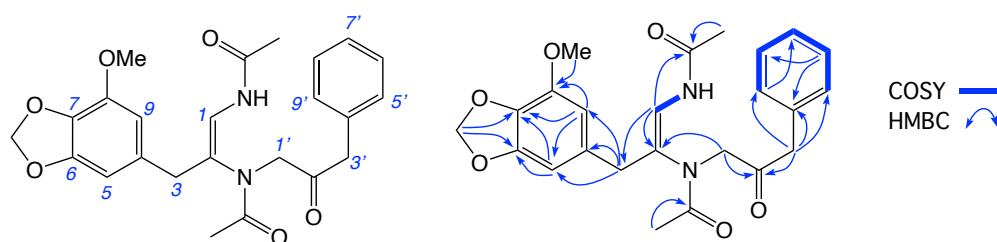

**Table S6.** 1D and 2D NMR (600 MHz, CDCl<sub>3</sub>) data for brasiliamide A (**8**)

| Position              | $\delta_{\text{H}}$ , multi ( <i>J</i> in Hz)<br>for <b>8</b> | $\delta_{\text{C}}$ | COSY       | <sup>1</sup> H- <sup>13</sup> C HMBC | Lit $\delta_{\text{H}}^{10}$                         | Lit $\delta_{\text{C}}^{10}$ |
|-----------------------|---------------------------------------------------------------|---------------------|------------|--------------------------------------|------------------------------------------------------|------------------------------|
| 1                     | 6.91, d (10.3)                                                | 122.2               | 1-NH       | 2, 3, 1-NHCO                         | 6.92, d (10.7)                                       | 122.2                        |
| 2                     | -                                                             | 122.4               | -          | -                                    | -                                                    | 122.5                        |
| 3                     | <i>a.</i> 3.29, d (14.8)<br><i>b.</i> 3.18, d (14.8)          | 40.2                | 3b<br>3a   | 1, 4, 5, 9<br>1, 4, 5, 9             | <i>a.</i> 3.29, d (14.7)<br><i>b.</i> 3.19, d (14.7) | 40.3                         |
| 4                     | -                                                             | 131.4               | -          | -                                    | -                                                    | 131.4                        |
| 5                     | 6.27, s                                                       | 103.0               | -          | 3, 9, 7, 6                           | 6.28, d (1.5)                                        | 103.0                        |
| 6                     | -                                                             | 149.1               | -          | -                                    | -                                                    | 149.1                        |
| 6-OCH <sub>2</sub>    | 5.95/ 5.95, AB <sub>q</sub>                                   | 101.5               | -          | 6, 7                                 | 5.95, d (1.5)<br>5.95, d (1.5)                       | 101.5                        |
| 7                     | -                                                             | 134.3               | -          | -                                    | -                                                    | 134.3                        |
| 8                     | -                                                             | 143.8               | -          | -                                    | -                                                    | 143.8                        |
| 8-OCH <sub>3</sub>    | 3.84, s                                                       | 56.7                | -          | 8                                    | 3.84, s                                              | 56.7                         |
| 9                     | 6.23, s                                                       | 108.3               | -          | 3, 5, 7, 8                           | 6.23, d (1.5)                                        | 108.2                        |
| 1-NH                  | 9.62, d (10.3)                                                | -                   | 1          | -                                    | 9.62, d (10.7)                                       | -                            |
| 1-NHCO                | -                                                             | 168.3               | -          | -                                    | -                                                    | 168.3                        |
| 1-NHCOCH <sub>3</sub> | 2.11, s                                                       | 22.3                | -          | 1-NHCO                               | 2.11, s                                              | 23.2                         |
| 1'                    | <i>a.</i> 4.53, d (17.1)<br><i>b.</i> 3.01, d (17.1)          | 56.6                | 1'b<br>1'a | 2', 2<br>2', 1'-NCO, 2               | <i>a.</i> 4.53, d (17.4)<br><i>b.</i> 3.02, d (17.4) | 56.6                         |
| 2'                    | -                                                             | 206.6               | -          | -                                    | -                                                    | 206.6                        |
| 3'                    | <i>a.</i> 3.81, d (16.0)<br><i>b.</i> 3.74, d (16.0)          | 47.9                | 3'b<br>3'a | 2', 4', 5'/9'                        | <i>a.</i> 3.81, d (16.2)<br><i>b.</i> 3.75, d (16.2) | 47.9                         |
| 4'                    | -                                                             | 132.8               | -          | -                                    | -                                                    | 132.8                        |
| 5'/9'                 | 7.17, d (7.4)                                                 | 129.4               | 6'/8'      | 3', 7', 5'/9'                        | 7.17, m                                              | 129.5                        |
| 6'/8'                 | 7.33, dd (7.4, 7.1)                                           | 128.9               | 5'/9', 7'  | 4', 6'/8'                            | 7.33, m                                              | 128.8                        |
| 7'                    | 7.29, d (7.1)                                                 | 127.5               | 6'/8'      | 5'/9'                                | 7.29, m                                              | 127.4                        |
| 1'-NCO                | -                                                             | 170.8               | -          | -                                    | -                                                    | 170.8                        |
| 1'-NCOCH <sub>3</sub> | 1.87, s                                                       | 20.1                | -          | 1'-NCO                               | 1.87, s                                              | 20.1                         |

10. Fujita, T.; Makishima, D.; Akiyama, K.; Hayashi, H., New convulsive compounds, brasiliamides A and B, from *Penicillium brasilianum* batista JV-379. *Biosci Biotechnol Biochem* **2002**, *66*, 1697-705.

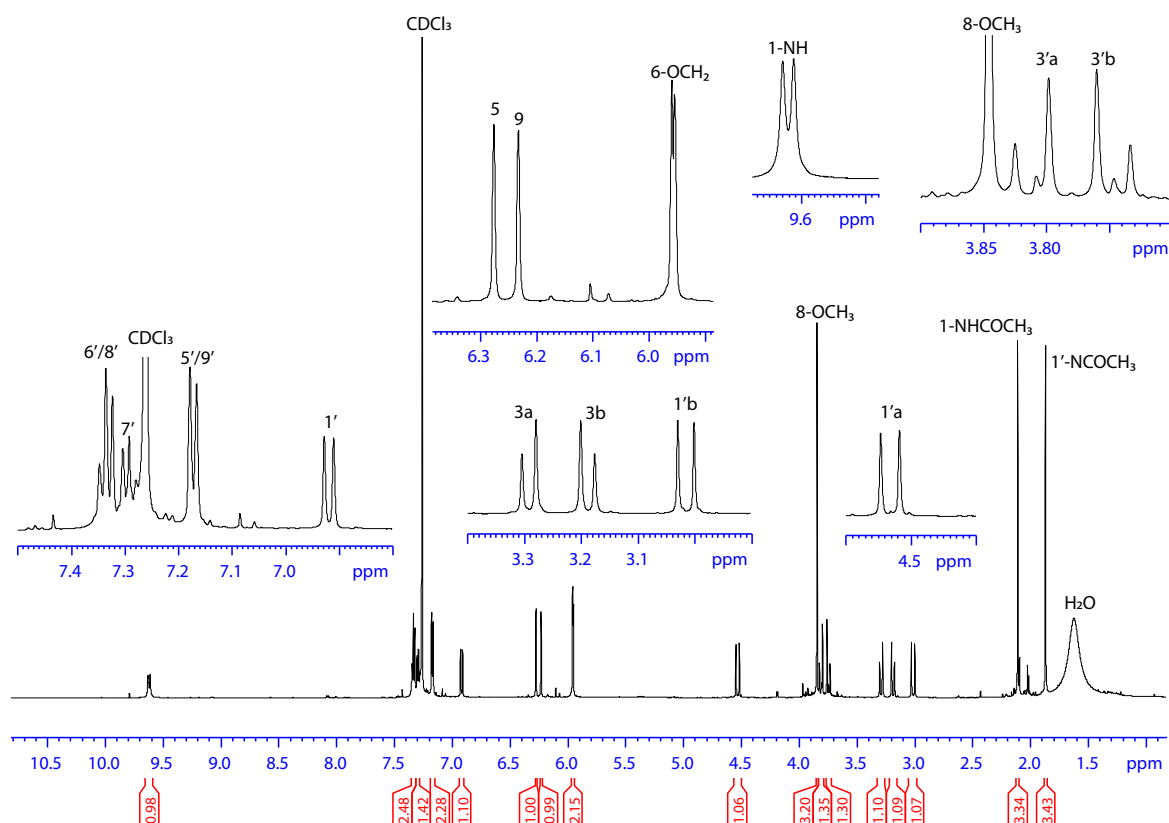

**Figure S43.**  $^1\text{H}$  NMR ( $\text{CDCl}_3$ ) spectrum for brasiliamide A (**8**)

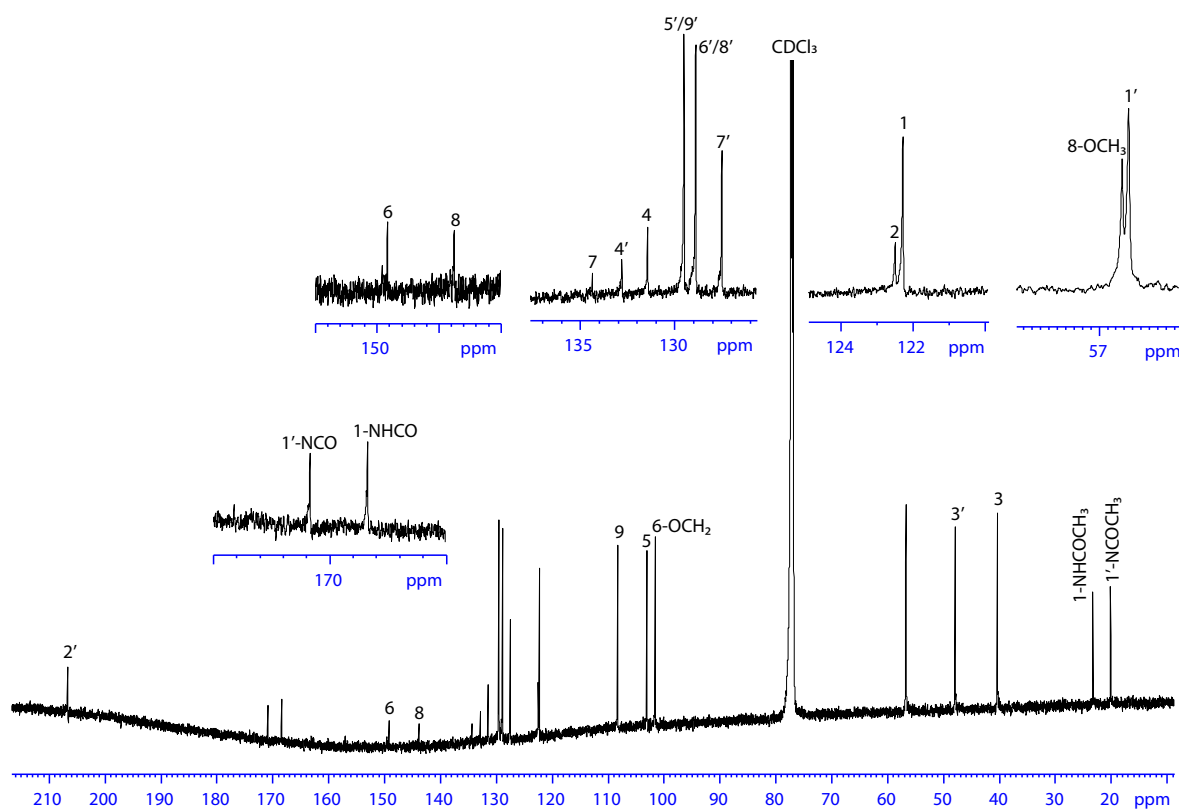

**Figure S44.**  $^{13}\text{C}$  NMR ( $\text{CDCl}_3$ ) spectrum for brasiliamide A (**8**)

## 19 Acid hydrolysis of chrysosporazine U (2)

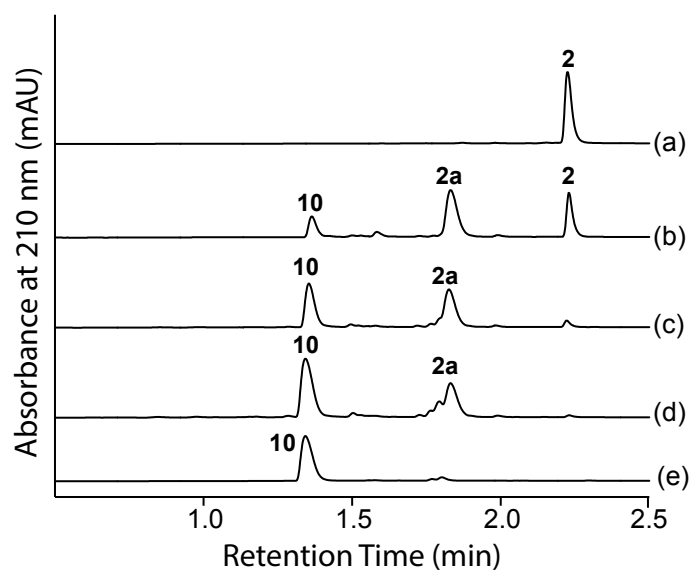

**Figure S45.** UPLC-DAD (210 nm) of acid hydrolysis of chrysosporazine U (**2**). (a) purified **2**; acid hydrolysis of **2** at (b) 12 hr, (c) 24 hr and (d) 36 hr; (e) purified **10**

## 20 Acid hydrolysis of azachrysosporazine U1 (4)

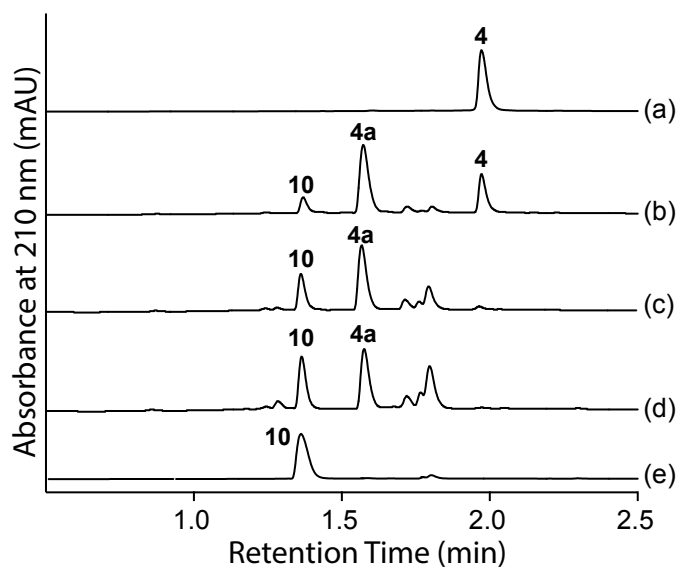

**Figure S46.** UPLC-DAD (210 nm) of acid hydrolysis of azachrysosporazine U1 (**4**). (a) purified **4**; acid hydrolysis of **4** at (b) 12 hr, (c) 24 hr and (d) 36 hr; (e) purified **10**

## 21 Acid hydrolysis of neochrysozporazine S (6)

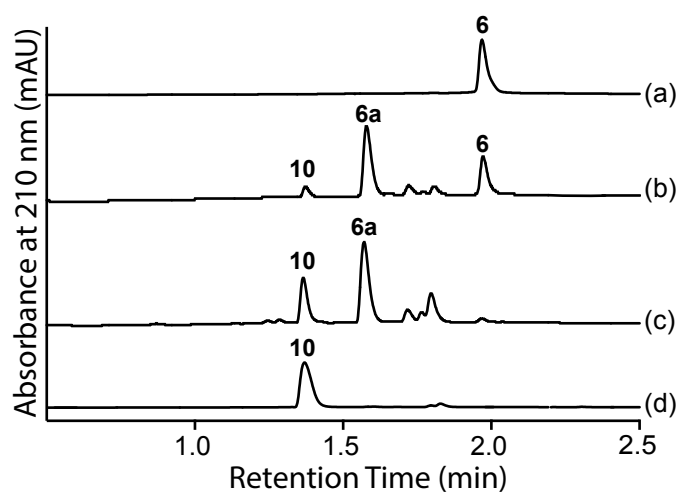

**Figure S47.** UPLC-DAD (210 nm) of acid hydrolysis of neochrysozporazine S (6). (a) purified 6; acid hydrolysis of 6 at (b) 12 hr, (c) 24 hr and (d) purified 10

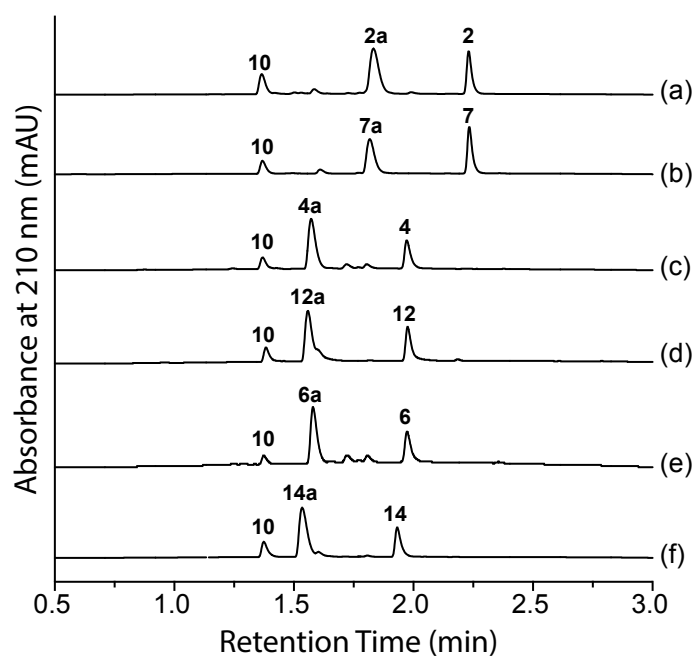

**Figure S48:** Comparison of UPLC-DAD retention times for 12hr hydrolysis products of (a) chrysozporazine U (2); (b) chrysozporazine D (7); (c) azachrysozporazine U1 (4); (d) azachrysozporazine D1 (12); (e) neochrysozporazine S (6); (f) neochrysozporazine J (14)

## 22 Antimicrobial Activity

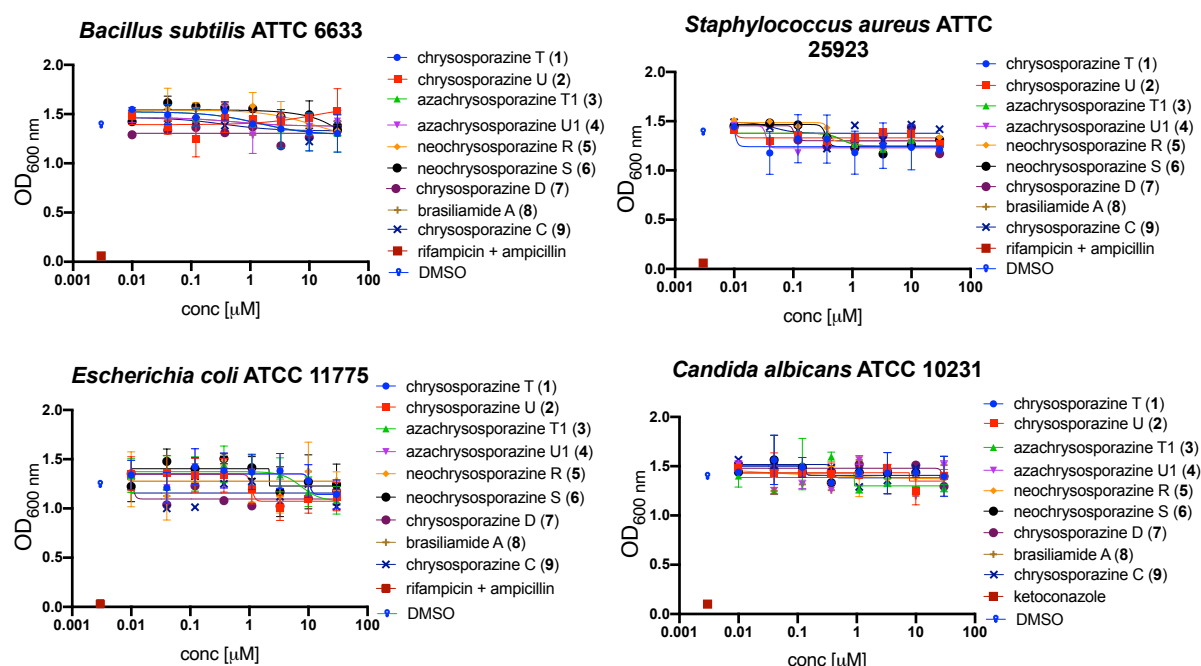

Figure S49. Growth inhibitory activity of chrysosporazines 1–9

## 23 Cytotoxicity and P-gp activity

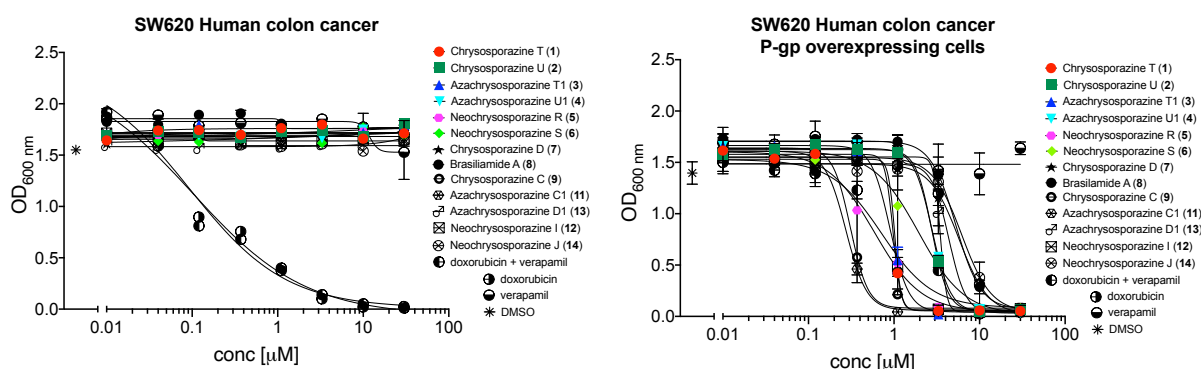

Figure S50. (A) cytotoxicity of chrysosporazines (1–14), doxorubicin and verapamil against SW620. (B) effect of chrysosporazines or verapamil (2.5  $\mu\text{M}$ ) on the sensitivity of P-gp overexpressing SW620 Ad300 cancer cells to doxorubicin. 48 h MTT cytotoxicity assay was performed with a series of concentrations of doxorubicin (30 – 0.01  $\mu\text{M}$ ) on P-gp overexpressing SW620 Ad300 in the presence and absence of verapamil (2.5  $\mu\text{M}$ ) or 2.5  $\mu\text{M}$  chrysosporazines (1–4). Data points are the means of  $\pm$  SEM of duplicate determination from two independent cultures.



**Table S7.** Effect of chrysosporazines (1–14) on inhibition of P-gp mediated resistance to doxorubicin in SW620 Ad300 and cytotoxicity against susceptible SW620

| SW620 Ad300                  |                                             |                 |                 | SW620                      |                                             |
|------------------------------|---------------------------------------------|-----------------|-----------------|----------------------------|---------------------------------------------|
| Treatment                    | IC <sub>50</sub> <sup>a</sup><br>( $\mu$ M) | FR <sup>b</sup> | GS <sup>c</sup> | Treatment                  | IC <sub>50</sub> <sup>a</sup><br>( $\mu$ M) |
| doxorubicin                  | 5.75                                        | 57.5            | 1.0             | doxorubicin                | 0.10                                        |
| + chrysosporazine T (1)      | 0.97                                        | 9.7             | 5.9             | chrysosporazine T (1)      | >30                                         |
| + chrysosporazine U (2)      | 2.76                                        | 27.6            | 2.0             | chrysosporazine U (2)      | >30                                         |
| + azachrysosporazine T1 (3)  | 0.89                                        | 8.9             | 6.4             | azachrysosporazine T1 (3)  | >30                                         |
| + azachrysosporazine U1 (4)  | 2.78                                        | 27.8            | 2.0             | azachrysosporazine U1 (4)  | >30                                         |
| + neochrysosporazine R (5)   | 0.58                                        | 5.8             | 9.9             | neochrysosporazine R (5)   | >30                                         |
| + neochrysosporazine S (6)   | 1.95                                        | 19.5            | 2.9             | neochrysosporazine S (6)   | >30                                         |
| + chrysosporazine D (7)      | 4.36                                        | 43.6            | 1.3             | chrysosporazine D (7)      | >30                                         |
| + brasiliamide A (8)         | 5.27                                        | 40.5            | 1.1             | brasiliamide A (8)         | >30                                         |
| + chrysosporazine C (9)      | 0.31                                        | 3.1             | 18.5            | chrysosporazine C (9)      | >30                                         |
| + azachrysosporazine C1 (11) | 0.27                                        | 2.7             | 21.3            | azachrysosporazine C1 (11) | >30                                         |
| + azachrysosporazine D1 (13) | 3.55                                        | 35.5            | 1.6             | azachrysosporazine D1 (13) | >30                                         |
| + neochrysosporazine I (12)  | 1.01                                        | 10.1            | 5.7             | neochrysosporazine I (12)  | >30                                         |
| + neochrysosporazine J (14)  | 6.18                                        | 61.8            | 0.9             | neochrysosporazine J (14)  | >30                                         |
| + verapamil (2.5 $\mu$ M)    | 0.71                                        | 7.1             | 8.1             | doxorubicin + verapamil    | 0.092                                       |
| verapamil                    | >30                                         | ND              | ND              | verapamil                  | >30                                         |

<sup>a</sup>MTT assay showing data as means of  $\pm$  SEM of two independent cultures.

<sup>b</sup>FR: fold-resistance was determined by dividing the IC<sub>50</sub> value for doxorubicin for P-gp overexpressing cancer cells by the IC<sub>50</sub> value for doxorubicin for sensitive cancer cells.

<sup>c</sup>GS: Gain in sensitivity was the ratio of IC<sub>50</sub> value of doxorubicin against SW620 Ad300 without testing compound to IC<sub>50</sub> value of doxorubicin against SW620 Ad300 with testing compound.

--: not calculated
